# 1 **MiR-124 synergism with ELAVL3 enhances target gene expression to promote neuronal** 2 **maturity**

3  
4 Ya-Lin Lu<sup>1,2,3</sup>, Yangjian Liu<sup>1,2</sup>, Matthew J. McCoy<sup>1,2,4</sup>† and Andrew S. Yoo<sup>1,2\*</sup>

5 <sup>1</sup>Department of Developmental Biology, Washington University School of Medicine, St. Louis,  
6 MO 63110, USA

7 <sup>2</sup>Center for Regenerative Medicine, Washington University School of Medicine, St. Louis, MO  
8 63110, USA

9 <sup>3</sup>Program in Developmental, Regenerative and Stem Cell Biology, Washington University  
10 School of Medicine, St. Louis, MO 63110, USA

11 <sup>4</sup>Program in Molecular Genetics and Genomics, Washington University School of Medicine, St.  
12 Louis, MO 63110, USA

13 †Present address: Department of Pathology, Stanford University School of Medicine, Stanford,  
14 CA 94305, USA

15  
16 \*Correspondence: yooa@wustl.edu

## 17 18 **Summary**

19 Neuron-enriched microRNAs (miRNAs), miR-9/9\* and miR-124 (miR-9/9\*-124), direct cell fate  
20 switching of human fibroblasts to neurons when ectopically expressed by repressing anti-  
21 neurogenic genes. How these miRNAs function after the onset of the transcriptome switch to a  
22 neuronal fate remains unclear. Here, we identified direct targets of miRNAs by Argonaute  
23 (AGO) HITS-CLIP as reprogramming cells activate the neuronal program and reveal the role of  
24 miR-124 that directly promotes the expression of its target genes associated with neuronal  
25 development and function. The mode of miR-124 as a positive regulator is determined by a  
26 neuron-enriched RNA-binding protein, ELAVL3, that interacts with AGO and binds target  
27 transcripts, whereas the non-neuronal ELAVL1 counterpart fails to elevate the miRNA-target  
28 gene expression. Although existing literature indicate that miRNA-ELAVL1 interaction can  
29 result in either target gene upregulation or downregulation in a context-dependent manner, we  
30 specifically identified neuronal ELAVL3 as the driver for miRNA target gene upregulation in  
31 neurons. In primary human neurons, repressing miR-124 and ELAVL3 led to the downregulation  
32 of genes involved in neuronal function and process outgrowth, and cellular phenotypes of  
33 reduced inward currents and neurite outgrowth. Results from our study support the role of miR-  
34 124 promoting neuronal function through positive regulation of its target genes.

## 35 36 **Introduction**

37 MiR-9/9\* and miR-124 (miR-9/9\*-124) function as reprogramming effectors that, when  
38 ectopically expressed in human adult fibroblasts (HAFs), induce an extensive reconfiguration of  
39 the chromatin accessibility landscape leading to the erasure of fibroblast fate and activation of  
40 the neuronal program (Abernathy et al. 2017). The conversion process by miR-9/9\*-124 shares  
41 similarities to molecular cascades underlying neurogenesis during neural development such as  
42 the downregulation of REST, a well-established transcription repressor of neuronal genes (Ballas  
43 et al., 2005; Lee et al., 2018; Schoenherr and Anderson, 1995) and switching of homologous  
44 chromatin modifiers from non-neuronal to neuronal counterparts including DNMT3B to  
45 DNMT3A, subunits of BAF/BRM-associated factor (BAF) complexes, and TOP2A to TOP2B  
46 (Abernathy et al., 2017a; Lee et al., 2018; Lessard et al., 2007; Staahl et al., 2013; Tsutsui et al.,  
47 2001; Watanabe et al., 1994; Yoo et al., 2009, 2011). Although the direct repression by brain-

48 enriched miRNAs on non-neuronal targets for initiating the neuronal program (Makeyev et al.,  
49 2007; Packer et al., 2008; Visvanathan et al., 2007; Yoo et al., 2009) offer a classic  
50 representation of miRNAs acting as negative regulators of target genes, how these miRNAs  
51 function within the neuronal gene network remains unknown.

52 Previous studies demonstrated that miR-9/9\*-124 expression is required throughout the  
53 conversion process till the endogenous miR-9/9\* and miR-124 are activated (Abernathy et al.,  
54 2017a; Victor et al., 2014). Because early miRNA expression during neuronal conversion  
55 functions to repress non-neuronal targets expressed in fibroblasts, we reason that the miRNAs  
56 remain necessary for the induction of the neuronal program after the repression of anti-  
57 neurogenic genes. In the present study, we performed high-throughput sequencing of RNA  
58 isolated by crosslinking immunoprecipitation (HITS-CLIP) of Argonaute (AGO HITS-CLIP)  
59 during miR-9/9\*-124-mediated neuronal reprogramming of human fibroblasts to map miR-9/9\*-  
60 124-target interactions at the onset of neuronal fate acquisition which led to an unexpected  
61 identification of neuronal genes enriched with AGO binding, in particular, corresponding to the  
62 binding sites of miR-124. The upregulation of these neuronal genes requires miR-124,  
63 suggesting that miR-124 not only function as a repressor, but also as an effector to promote  
64 neuronal gene expression. Although the ability of miRNAs as a positive effector of downstream  
65 target genes has been implicated before (Truesdell et al., 2012; Vasudevan et al., 2007;  
66 Vasudevan and Steitz, 2007), little is known about the molecular mechanism that governs a  
67 miRNA's activity as a positive regulator of target genes in neurons and the identity of activated  
68 target genes. Here, we use homologous genes, *PTBP1* and *PTBP2*, as a model to dissect how  
69 miR-124 selectively upregulates *PTBP2* expression in neurons and reveal genetic networks that  
70 are enhanced by miR-124 in both reprogrammed and primary human neurons.

## 71 72 **Results**

### 73 74 **AGO binds both downregulated and upregulated genes during miR-9/9\*-124-mediated** 75 **direct neuronal reprogramming of human fibroblasts**

76  
77 Previous studies showed that the ectopic expression of miR-9/9\*-124 in human adult fibroblasts  
78 (HAFs) induces a neuronal state characterized by the appearance of neuronal markers (such as  
79 MAP2, TUBB3, NCAM, and SNAP25) (Figure 1A) and electrical excitability (Abernathy et al.  
80 2017). To identify target genes of miR-9/9\*-124 as reprogramming cells transition to neuronal  
81 identity, we carried out AGO HITS-CLIP after two weeks into reprogramming, a time point  
82 when neuronal genes are activated (Abernathy et al. 2017), to identify transcripts bound with  
83 AGO loaded with miR-9/9\* or miR-124 over the non-specific miRNA (miR-NS) control  
84 ( $\text{Log}_2\text{FC} \geq 1$ ; adj.P-value  $< 0.05$ ). We compared these hits to the list of differentially expressed  
85 genes (DEGs) (by RNA-seq analysis;  $-1 \leq \text{Log}_2\text{FC} \leq 1$ ; adj.P-value  $< 0.05$ ) at day 20 of miRNA-  
86 induced neurons (miNs) (Abernathy et al. 2017). As expected, we found target transcripts that  
87 were downregulated consistent with the repressive mode of miRNAs (Figure 1B, 113 genes  
88 labeled as green dots) including some known targets, *SHROOM3* and *PHF19* (Lu et al., 2018;  
89 Neo et al., 2014; Zhou et al., 2014). Interestingly, we also discovered 453 unique gene transcripts  
90 with enriched AGO binding, which were upregulated in day 20 miNs (Figure 1B, red dots). By  
91 gene ontology (GO) analysis, these upregulated genes with enriched AGO loading in response to  
92 miR-9/9\*-124 were associated with various neuronal processes such as synaptic transmission  
93 and regulation of membrane potential (red), in contrast to non-neuronal, downregulated target  
94 genes (green) (Figure 1C). Moreover, when examined against the time-course transcriptome

95 analysis during neuronal reprogramming (Abernathy et al. 2017), the expression of the identified  
96 neuronal target genes showed continuous upregulation during later time point of neuronal  
97 conversion (Figure 1D). For example, neuronal transcripts such as *MAP2*, *PTBP2*, and *SLC4A8*  
98 that were highly expressed in day 20 miNs harbored AGO binding sites at the 3'UTR (Figure  
99 1E). To determine the fraction of upregulated neuronal genes that are likely actual targets of  
100 miR-9/9\* and/or miR-124, we extracted the AGO-enriched sequences and predicted the duplex  
101 formation by either miR-9/9\* and/or miR-124 through RNAhybrid (a maximum free energy  
102 threshold of -20 kcal/mol) (Rehmsmeier, 2004). Of the 453 upregulated DEGs in miNs bound by  
103 AGO (Figure 1B), 328 (~72%) gene transcripts are predicted to contain miR-9/9\* and/or miR-  
104 124 binding sites (Figure 1F). These transcripts harboring miR-9/9\*-124 sites are also associated  
105 with the similar set of neuronal GO terms in Figure 1C as they include a selection of genes  
106 important for neuronal function (Figures 1F). Of these upregulated miR-9/9\*-124 target genes,  
107 more than 94% of the total genes (308 of 328 genes) contain miR-124 target sequence alone  
108 (45%) or with miR-9/9\* sites, while less than 6% of the genes (20 genes) contain miR-9/9\*  
109 target sites only (Figure 1G). These results collectively demonstrate that the AGO-loaded  
110 transcripts differentially (up or down) respond to miR-9/9\*-124 during neuronal conversion.  
111

### 112 **MiR-124 target genes are upregulated during neuronal conversion**

113

114 As a large fraction of the upregulated genes contained miR-124 target sequences (Figure 1G), we  
115 further tested if the upregulated genes were *bona fide* targets of miR-124 by knocking down  
116 miR-124 expression through the use of a tough decoy (TuD) to inhibit miRNA activity (Bak et  
117 al., 2013; Haraguchi et al., 2009). The effect of the lentivirus-based TuD for miR-124 (TuD-  
118 miR-124) was monitored after transduction by following the concurrent expression of TurboRFP  
119 reporter built in the lentiviral vector and measuring the mature miR-124 level. TuD-miR-124  
120 yielded more than 60% reduction of miR-124 expression in comparison to the control, non-  
121 specific miRNA tough decoy (TuD-miR-NS) (Figure S1A-S1B). We then performed RNA-seq  
122 analysis on day 20 miNs treated with either TuD-miR-NS or TuD-miR-124 to see whether any of  
123 the miR-124 target would fail to be upregulated with TuD-miR-124 treatment (Figure 2A, S1C).  
124 When compared with upregulated DEGs in day 20 miNs that were also enriched for AGO  
125 binding (Figure 1), we identified 192 genes ( $\text{Log}_2\text{FC} \leq 0.5$ ;  $\text{adj.P-value} < 0.01$ ) that failed to be  
126 upregulated upon miR-124 reduction (Figure 2A, Table S1). With GO analysis, these identified  
127 genes were associated with neuronal terms involved in various synaptic processes (Figure 2B).  
128

129 To further analyze miR-124-target interactions, we looked into the potential duplex  
130 formations between miR-124 and the identified AGO HITS-CLIP peak regions using  
131 RNAhybrid (a maximum free energy threshold of -20 kcal/mol) (Rehmsmeier, 2004). Of the  
132 upregulated transcripts that harbor AGO-enriched peaks, we identified a spectrum of miR-124  
133 and target mRNA duplex configurations ranging from the canonical 2-8 seed base pairing to non-  
134 canonical base pairing starting at position 3 and 4 (Figures 2C, S1D, and S2). These examples  
135 include *MAP2* 3'UTR, in which miR-124 base pairing is predicted to start at position 3, while  
136 miR-124 target sequences on *PTBP2* 3'UTR at the two peaks are predicted to start at position 1  
137 and position 2, respectively (Figure 2C). Interestingly, across the predicted miR-124:target  
138 duplex configurations, we observed consistent auxiliary 2-3 base pairing at the 3' end of miR-  
124 (Figure S1D).

139 Our results so far indicate that miR-124 can target and promote the expression of select  
140 neuronal genes when cells acquire the neuronal fate during neuronal conversion. We wondered if  
141 the active mode of miR-124 would be specific to neuronal cell types. We cloned the 3'UTRs of

142 several identified, upregulated targets (*MAP2*, *PTBP2*, *BCL7A*, *KALRN*, *SEMA6A*, *RCAN2*) into  
143 a luciferase reporter construct and transfected into a non-neuronal cell type, HEK293T (a human  
144 embryonic kidney cell line), with a miR-9/9\*-124 expression construct. After 48 hours post-  
145 transfection, we found that unlike reprogrammed neurons, miR-9/9\*-124 instead, repressed the  
146 luciferase signal in HEK293T cells in comparison to the control miR-NS, while the non-target  
147 control, *PGK1* 3'UTR was unaffected (Figure 2D). This result suggests that additional  
148 determinants available in neuronal cells may be in play to govern the activity of miR-124 as a  
149 positive regulator while simultaneously functioning to repress non-neuronal targets (Figure 2E).

150

### 151 **PTBP1 and PTBP2 3'UTR as targets of miR-124**

152 To further dissect the mechanism underlying the dual modes of miR-124 on its targets, we  
153 elected to focus on *PTBP2* from the list of our identified neuronal targets because i) *PTBP2* and  
154 its non-neuronal homolog, *PTBP1*, both contain miR-124 sites in their 3'UTRs (Figure 3A), and  
155 ii) both *PTBP1* and *PTBP2* 3'UTRs are targeted and repressed by miR-124 in HEK293T cells  
156 (Figure 3A), and iii) contrastingly, as observed in the human brain, qPCR analysis showed that  
157 the neuronal conversion established the mutually exclusive expression between *PTBP1* and  
158 *PTBP2* (Figure 3B). Therefore, the PTB homologs represent an ideal example to investigate how  
159 two closely related targets respond differently to miR-124.

160 The 3'UTRs of human *PTBP1* and *PTBP2* contain two predicted target sites for miR-124  
161 (yellow bar) and one site for miR-9 (blue bar) (Figure 3A). Luciferase reporter assays in the non-  
162 neuronal HEK293T cells showed that miR-9/9\*-124 or miR-124 alone (but not miR-9/9\* alone)  
163 repressed both *PTBP1* and *PTBP2* through their 3'UTRs indicating that miR-124 is the primary  
164 miRNA targeting both PTB 3'UTRs (Figure 3A). Mutating the two miR-124 sites in *PTBP2*  
165 3'UTR (s1 and s2) rendered the 3'UTR insensitive to miR-124 (Figure S3A). While our results  
166 pointing to the ability of miR-124 to target and repress 3'UTRs of both *PTBP1* and *PTBP2* in  
167 cell lines were consistent with previous findings (Makeyev et al., 2007; Xue et al., 2016), it  
168 remains unknown how miRNA-mediated neuronal conversion of HAFs establishes the mutually  
169 exclusive expression of *PTBP1* and *PTBP2* as seen in the human brain (Figure 3B) and in *in vivo*  
170 neurons (Boutz et al., 2007).

171 Because *PTBP1* and *PTBP2* are regulated differentially in miNs, we asked whether the  
172 repressive activity of miR-124 on *PTBP2* 3'UTR could be reversed with a prolonged neurogenic  
173 input by miR-9/9\*-124 in HEK293T cells. We expressed a destabilized EGFP reporter  
174 containing *PTBP1* 3'UTR, *PTBP2* 3'UTR, or control 3'UTR (CTL) that lacks a 3'UTR in  
175 HEK293T cells with the miR-9/9\*-124 expression construct (Figure S3B). Analogous to *PTBP2*  
176 upregulation during neuronal reprogramming of HAFs, we observed the selective repression of  
177 EGFP with *PTBP1* 3'UTR but not *PTBP2* 3'UTR (Figures S3B-C). These results suggest that  
178 with the prolonged neurogenic input, *PTBP2* 3'UTR responds to miR-124 differentially from  
179 when measured after 48 hours with miRNA expression in HEK293T cells (Figures 2A and 3A).

180

### 181 **MiR-124 accentuates PTBP2 expression beyond the induction mediated by the** 182 **downregulation of PTBP1**

183

184 Previous studies have shown that during development, *PTBP1* destabilizes *PTBP2* transcript in  
185 non-neuronal cells by alternative splicing, and at the onset of neurogenesis, miR-124 directly  
186 represses *PTBP1* resulting in *PTBP2* induction (Boutz et al., 2007; Makeyev et al., 2007). Upon  
187 miR-9/9\*-124 expression in HAFs, we observed the concomitant downregulation and  
188 upregulation of endogenous *PTBP1* and *PTBP2*, respectively (Figure 3B). As expected, the

189 initial PTBP2 upregulation was abrogated when *PTBP1* cDNA was overexpressed (Figure 3C),  
190 supporting the role of PTBP1 reduction as the initiation step of PTBP2 expression. We then  
191 sought to stratify the contribution of PTBP1 repression alone versus the input of miRNAs to the  
192 overall PTBP2 level. When PTBP2 protein levels were compared between PTBP1 knockdown  
193 with a short hairpin RNA (shRNA) and miR-9/9\*-124 expression, we found that miR-9/9\*-124  
194 enhanced the PTBP2 level by approximately a two-fold increase over the PTBP1 knockdown  
195 alone condition (Figure 3D). In fact, PTBP2 was more upregulated with miR-9/9\*-124 despite  
196 the more pronounced reduction of PTBP1 with shRNA (Figure 3D), demonstrating that miR-  
197 9/9\*-124 accentuate PTBP2 expression beyond the level induced by PTBP1 downregulation.  
198

### 199 **Functional significance of PTBP2 upregulation for neuronal conversion**

200  
201 To probe the functional importance of *PTBP2* expression, we knocked down *PTBP2* with an  
202 shRNA during neuronal conversion. *PTBP2* shRNA completely impaired the induction of  
203 neurons marked by the loss of MAP2 expression, a neuronal marker (Figure 3E). The effect of  
204 shRNA was specific to *PTBP2* knockdown as supplementing *PTBP2* cDNA rescued the  
205 reprogramming defect (Figure 3E). These findings were somewhat surprising as the results from  
206 a previous study indicated that sequential reduction of PTBP2 by shRNA was found to promote  
207 maturation of reprogrammed neurons (Xue et al. 2016); however, our results indicate that at least  
208 at the initiation of reprogramming, PTBP2 is critical. While it is not clear why shRNA- versus  
209 miRNA-based reprogramming approaches lead to these different results, our results demonstrate  
210 the essential role of PTBP2, at least, at the onset of neuronal conversion. Furthermore, knocking  
211 down PTBP2 in primary cultured human neurons resulted in increased cell death as measured  
212 with SYTOX assay (Figure S4A-B), consistent with previous studies that showed the essential  
213 function of PTBP2 in primary neurons (Li et al., 2014).

214 We also performed Human Clariom D Assay in HAFs expressing the non-specific control  
215 miR-NS, miR-9/9\*-124, or miR-9/9\*-124 with *PTBP2* shRNA to identify genes whose  
216 expression and alternative splicing patterns were affected by the reduction of PTBP2. By two  
217 weeks, miR-9/9\*-124-expressing cells showed significant downregulation of *PTBP1* and other  
218 fibroblast-enriched genes such as *FBN1* and *S100A4*, and upregulation of *PTBP2* and neuronal  
219 genes (for example, *NEFM*, and *SNAP25*) in comparison to the control miR-NS (FC  $\geq 1.5$ ,  
220 ANOVA p-value  $< 0.05$ ) (Figure S4C) (Abernathy et al., 2017). Alternative splicing events  
221 mediated by PTBP2 were examined by comparing spliced events between *PTBP2* shRNA and  
222 control shRNA (shCTL) conditions. We found that reducing PTBP2 led to changes in splicing  
223 events ( $-2 \leq$  splicing index  $\leq 2$ , ANOVA p-value  $< 0.05$ ) indicated by red (positive splicing  
224 index) and green dots (negative splicing index) (Figure S4D). This analysis identified known  
225 splicing targets of PTBP2, such as the exon skipping or exclusion in *UNC13B*, *DLG4*, and  
226 *CADM3*, and inclusion in *DNMI* and *SMARCC2* transcripts (Figure S4D) (Li et al., 2014;  
227 Licatalosi et al., 2012; Vuong et al., 2016; Zheng et al., 2012). Comparing genes upregulated in  
228 response to miR-9/9\*-124 to genes associated with PTBP2-mediated alternative splicing  
229 (differential splicing events between miR-9/9\*-124-shCTL and shPTBP2 conditions), identified  
230 1183 differentially spliced transcripts of genes involved in processes such as neuronal  
231 differentiation and signaling (Figure S4E) (Table S2). Altogether, our results support the role of  
232 PTBP2 as a crucial regulator of the neuronal program.  
233

### 234 **Differential sequence composition between PTBP1 and PTBP2 3'UTRs**

235

236 Using PTBP1 downregulation and PTBP2 upregulation as a model, we sought to identify  
237 effectors that determine miR-124 function as a positive regulator. RNA-binding proteins (RBPs)  
238 have been shown to interact with miRNA-loaded RISC complexes to modulate target gene  
239 expression (Iadevaia and Gerber, 2015; Jiang and Collier, 2012; Plass et al., 2017). We ran the  
240 sequence of *PTBP2* 3'UTR through three RBP motif prediction databases, including RBPDB  
241 (Cook et al., 2011), RBPmap (Paz et al., 2014), and beRBP (Yu et al., 2018) (Figure S5A).  
242 Across the three databases, two RBPs, ELAVL1 and PUM2, were consistently predicted to bind  
243 to *PTBP2* 3'UTR (Figure S5A). As PTBP2 upregulation occurs in neurons, we focused on the  
244 family of RBPs whose expression is neuronally enriched. Whereas *ELAVL1* and Pumilio family  
245 RBPs, *PUM2* or its homolog, *PUM1*, are ubiquitously expressed (Lin et al., 2018; Okano and  
246 Darnell, 1997; Spassov and Jurecic, 2002), other ELAVL family members, *ELAVL2*, *ELAVL3*,  
247 and *ELAVL4* (collectively referred to as neuronal *ELAVLs*, *nELAVLs*), have been shown to be  
248 neuronally enriched (Okano and Darnell, 1997). We also examined the HITS-CLIP data of  
249 nELAVLs in the human brain (Scheckel et al., 2016) and found nELAVLs to be highly enriched  
250 at *PTBP2* 3'UTR, in contrast to *PTBP1* 3'UTR (Figure S5B-C). Interestingly, *PTBP2* 3'UTR  
251 contains AU-rich elements (AREs) that ELAVLs have been shown to bind to (Ince-Dunn et al.,  
252 2012; Scheckel et al., 2016), in contrast to *PTBP1* 3'UTR that lacks the ARE (Figure S5B).  
253 Moreover, nELAVL binding mapped to the ARE around the first miR-124 site (s1; seed,  
254 highlighted in red) *PTBP2* 3'UTR (Figure S5C). We thus examined by qPCR if nELAVLs are  
255 induced during neuronal conversion as well as other brain-enriched RBP markers including  
256 NOVA-, RBFOX-family proteins, and SSRM4. We found selective upregulation of nELAVLs  
257 with other neuronal RBPs in miNs similarly to the human brain, in contrast to the ubiquitous  
258 expression of *ELAVL1* (Figure 4A) (Okano and Darnell, 1997). To determine if nELAVL  
259 induction occurs concurrently with PTBP2 upregulation, we assessed ELAVL expression at  
260 multiple time points of neuronal conversion. We found that the transcriptional activation of  
261 nELAVLs, with *ELAVL3* being the most robust one (blue), aligned with the upregulation of  
262 *PTBP2* (black) by nine days into reprogramming (Figure 4B).

263

### 264 **MiRNA-mediated PTBP2 induction requires ELAVL3 binding at PTBP2 3'UTR**

265

266 We then tested whether ARE within *PTBP2* 3'UTR would serve as a sequence that binds  
267 ELAVL proteins by expressing 3'UTRs of *PTBP1*, *PTBP2*, or *PTBP2* without ARE  
268 (*PTBP2* $\Delta$ ARE 3'UTR) with individual FLAG-tagged ELAVLs (ELAVL1-4) in HEK293T cells  
269 (Figure 4C). RNA-immunoprecipitation (RIP) of FLAG-ELAVLs with FLAG antibody,  
270 followed by qPCR for detecting the loaded 3'UTRs using primers specific for either *PTBP1* or  
271 *PTBP2* displayed significant enrichment for *PTBP2* 3'UTR with nELAVL (ELAVL2, 3, and 4)  
272 pull-downs, while the binding of ELAVL1 to *PTBP2* 3'UTR was minimal. We could not detect  
273 significant enrichment for *PTBP1* 3'UTR for any of the ELAVLs (Figure 4C). Importantly,  
274 deleting ARE in *PTBP2* 3'UTR (*PTBP2* $\Delta$ ARE 3'UTR) abolished the binding of nELAVL  
275 proteins to *PTBP2* 3'UTR (Figure 4C) indicating that ARE within *PTBP2* 3'UTR serves to  
276 recruit nELAVLs.

277 We then asked whether adding nELAVLs to the non-neuronal context of HEK293T cells,  
278 thereby reconstituting nELAVLs that become available during neuronal conversion, would  
279 alleviate miR-124-mediated repression of PTBP2 and enhance PTBP2 expression. Adding  
280 individual ELAVLs to control *PGK1* 3'UTR had no effect on luminescence (relative  
281 luminescence of ~ 1; *PGK1* 3'UTR histograms) (Figure 4D). Luciferase activities with *PTBP1*  
282 3'UTR remained repressed upon miR-9/9\*-124 expression compared to the control miR-NS

283 irrespective of the ELAVL addition (relative luminescence of  $< 1$ ; *PTBP1* 3'UTR histograms)  
284 (Figure 4D). MiR-9/9\*-124 led to the repression *PTBP2* 3'UTR in the absence of ELAVLs  
285 (black, relative luminescence ratio  $< 1$ ; *PTBP2* 3'UTR histograms) (Figure 4D). However,  
286 adding ELAVL2 (green) and ELAVL3 (blue) significantly alleviated miR-9/9\*-124-mediated  
287 repression on *PTBP2* 3'UTR, with especially ELAVL3 (blue) having the most significant effect  
288 on elevating the luciferase activity in comparison to the control construct (Figure 4D). To  
289 examine the requirement of ARE, we repeated the ELAVL addition experiments using the  
290 luciferase cassette with *PTBP2* 3'UTR lacking the ARE sequence (*PTBP2 $\Delta$ ARE*). Deleting ARE  
291 abolished the effect of ELAVL3 (blue) on *PTBP2* (*PTBP2 $\Delta$ ARE* 3'UTR histograms), which  
292 stayed repressed (Figure 4D), demonstrating the requirement of ELAVL3 and ARE for *PTBP2*  
293 upregulation by miR-124.

294

### 295 **Selective activity of ELAVL3 on PTBP2 3'UTR is dependent on the hinge region**

296

297 ELAVL1-4 members exhibit high sequence homology across all three functional RNA  
298 recognition motifs (RRMs) except for the non-conserved spacer region (also referred to as hinge  
299 region) flanked by RRM2 and RRM3 (Hinman et al., 2013; Okano and Darnell, 1997). To better  
300 understand the specificity of ELAVL3 on *PTBP2* 3'UTR regulation, we mutagenized the hinge  
301 region of *ELAVL1* and *ELAVL3* by deleting or swapping the hinge region (H) between *ELAVL1*  
302 and *ELAVL3*. Deleting the H in *ELAVL3* (*ELAVL3 $\Delta$ H*) (light blue) abrogated the alleviating  
303 effect on *PTBP2* 3'UTR repression, whereas no effect was observed with *PGK1* 3'UTR (Figure  
304 4E, *PGK1* 3'UTR histograms). Moreover, replacing the *ELAVL3* H with *ELAVL1* H (*ELAVL3-  
305 E1H*) (dark blue) led to the failure of alleviating the *PTBP2* 3'UTR repression (Figure 4E), and  
306 none of the *ELAVL3* variants (wild-type and mutants) had any effect on *PTBP2 $\Delta$ ARE* 3'UTR  
307 (Figure 4E, *PTBP2 $\Delta$ ARE* 3'UTR histograms). These results indicate that the specificity of  
308 ELAVL3 to *PTBP2* 3'UTR is mediated by the *ELAVL3* H region. This notion is further  
309 supported by the increase in the luminescence readout of *PTBP2* 3'UTR in HEK293T cells when  
310 *ELAVL1* H is replaced by *ELAVL3* H (*ELAVL1-E3H*) (dark red) compared to wild-type *ELAVL1*  
311 (red) (Figure 4F, *PTBP2* 3'UTR histograms).

312

### 313 **ELAVL3 promotes PTBP2 expression during neuronal reprogramming**

314

315 To further examine if ELAVL3 would be critical for PTBP2 upregulation during the neuronal  
316 conversion of HAFs, we knocked down *ELAVL3* by shRNA (shELAVL3) to assess PTBP2  
317 expression and neuronal reprogramming. Knocking down ELAVL3 resulted in the significant  
318 downregulation of PTBP2 expression as determined by immunostaining, qPCR, and  
319 immunoblotting analyses, and impairment of the conversion process (Figures 5A-C). This  
320 knockdown effect was specific for ELAVL3 downregulation as PTBP2 expression and neuronal  
321 fate acquisition could be rescued by overexpressing *ELAVL3* cDNA in the presence of shELAV3  
322 (Figure 5A). It is noteworthy that reducing the function of other nELAVLs (ELAVL2 and 4) had  
323 a milder effect on PTBP2 expression (Figures 5B-C), highlighting the role of ELAVL3 as a  
324 primary driver for PTBP2 upregulation with miR-124.

325

### 326 **Synergism between nELAVL and AGO requires miR-124 site in PTBP2 3'UTR**

327

328 We further tested whether the miR-124 sites within *PTBP2* 3'UTR would also be critical for  
329 mediating the PTBP2 upregulation with ELAVL3. By mutating the miR-124 seed-match

330 sequences within *PTBP2* 3'UTR (*PTBP2Δs1s2* 3'UTR), adding ELAVLs failed to enhance the  
331 luciferase activity over the control (CTL, black; relative luminescence ratio unchanged;  
332 *PTBP2Δs1s2* 3'UTR histograms) (Figure 5D). This result is in contrast to wild-type *PTBP2*  
333 3'UTR where ELAVL3 can enhance luciferase activity in the presence of miR-124 target sites  
334 (Figures 4D, 5D). Interestingly, the lack of the increased luminescence with ELAVL3 addition  
335 was not due to the failure of ELAVL binding to *PTBP2Δs1s2* 3'UTR because qPCR analysis  
336 with nELAVL-RIP showed persistent binding of ELAVLs to *PTBP2Δs1s2* 3'UTR (Figure 5E).  
337 These results altogether suggest the requirement of both ARE and miR-124 sites in *PTBP2*  
338 3'UTR for PTBP2 upregulation (Figure 5F).

339

### 340 **Neuronal genes downregulated upon loss of miR-124 and ELAVL3 in human neurons**

341

342 To test whether the synergism of miR-124 and ELAVL3 for miRNA-mediated upregulation is  
343 unique to PTBP2 or a broader mechanism applicable to other genes beyond reprogrammed  
344 neurons, we performed loss-of-function studies on primary human neurons (HNs). With the same  
345 TuD-miR-124 and shELAVL3 constructs used in reprogrammed neurons, miR-124 and  
346 ELAVL3 were knockdown in HNs and processed for RNA-seq (Figures 6A-B and S6A). To  
347 identify potential targets upregulated by miR-124 and ELAVL3 in HNs, we focused on genes  
348 suppressed upon expression of TuD-miR-124 and shELAVL3 (KD,  $\text{Log}_2\text{FC} \leq -1$ ;  $\text{adj.P-value} <$   
349  $0.05$ ) compared to CTL (Figure 6B). Many of these downregulated genes are neuronal-related,  
350 including *MAP2*, *PTBP2*, *SCN1A*, and *SEMA6A* (Figure 6B). Despite the downregulation of  
351 several neuronal transcripts, overall neuronal identity remains intact as expression of neuronal  
352 markers such as *RBFOX2*, *FMRI*, and *NEFL* remain similar between CTL and KD HNs (Figure  
353 S6B). Furthermore, we also do not observe an emergence of progenitor marker expression upon  
354 knockdown of both miR-124 and ELAVL3 (Figure S6B).

355 To ensure that these downregulated genes are miR-124 targets, we compared the  
356 downregulated DEGs from HNs to upregulated DEGs in day 20 miNs that also harbor AGO-  
357 enriched peaks (Figure 1). This comparison resulted in a set of 132 target genes associated with  
358 biological GO terms related to neuronal development and projection (Figure 6C, Table S3),  
359 further validating miR-124 as a positive regulator of the neuronal program. Examples of some  
360 these identified targets in HNs also validated in qPCR include *PTBP2*, *MAP2*, *SEMA6A*, *SCN1A*,  
361 and *KALRN* (Figures 6D-F). Together our data support the notion that miR-124-mediated  
362 upregulation of neuronal genes is not unique to PTBP2 in reprogramming context, but applicable  
363 to other neuronal genes in actual human neurons.

364

### 365 **MiR-124 and nELAVL interaction for other neuronal transcripts**

366

367 Using existing nELAVL HITS-CLIP of the human brain (Scheckel et al., 2016), we performed a  
368 comparative analysis with our HNs dataset to examine if these upregulated neuronal transcripts  
369 are likely targets of nELAVLs. First, by overlapping i) upregulated neuronal DEGs bound by  
370 AGO HITS-CLIPs (Figure 1), ii) DEGs responsive to miR-124 tough decoy and *ELAVL3*  
371 shRNA in HNs (Figure 6), and iii) genes bound by nELAVLs in the human brain (Scheckel et  
372 al., 2016), we identified 77 genes, including *PTBP2*, *MAP2*, *SLCA48*, *KALRN*, *BCL7A*, and  
373 *SCN1A* enriched for neuronal biological terms generally involved in synaptic processes (Figures  
374 6G and S7, Table S4). Based on these comparisons, similar to what we observed in miNs, miR-  
375 124 and ELAVL3 appear to collectively upregulate a set of neuronal genes that are likely critical  
376 for neuronal function in primary HNs.



377

## 378 **Neuronal properties affected by miR-124 and nELAVLs**

379

380 As our AGO-HITS-CLIP and miR-124 knockdown data in miNs indicate that neuronal genes are  
381 preferentially targeted as cells acquire the neuronal fate (Figures 1 and 2), we examined the  
382 global transcriptome changes of our knockdown (KD) and control (CTL) conditions in HNs with  
383 LONGO analysis to assess changes in long gene expression (LGE), a measure of neuronal  
384 identity and maturation (Gabel et al., 2015; King et al., 2013; McCoy et al., 2018; McCoy and  
385 Fire, 2020; Sugino et al., 2014). Overall, knockdown of miR-124 and ELAVL3 (KD, green) in  
386 HNs resulted in reduced LGE compared to control (CTL, red), suggesting that both players are  
387 likely essential for the expression of long genes (Figure 7A).

388 As a number of identified neuronal genes targeted by AGO-miR-124 and ELAVL3 in  
389 HNs are implicated in neuronal function and morphology such as *SCN1A*, *SLC4A8*, *ANK3*, and  
390 *MAP2*, reflective of reduced overall LGE (Figures 7A and S7A, Table S4), we examined a few  
391 neuronal properties in CTL and KD HNs. We first performed electrophysiology and found KD  
392 HNs exhibited reduced inward sodium current as compared to CTL HNs (Figures 7B and S6C-  
393 D) which we reasoned to be attributed to a number of downregulated channel genes in KD HNs.  
394 However, other electrical properties such as resting membrane potential and action potential  
395 firing appear similar between CTL and KD HNs (Figures S6D-E). In addition, as we observed  
396 reduced neurite complexity in our KD cells compared to CTL HNs, we sought to measure  
397 features such as average neurite length and average number of neurite branches between the two  
398 conditions. Overall, we found that KD HNs not only have shorter average neurite length per cell,  
399 but also have fewer branches per cell compared to CTL (Figures 7C-E).

400 Reduced LGE in primary HNs with both miR-124 and ELAVL3 knockdown suggests  
401 that LGE is a transcriptomic phenotype reflective of altered neuronal features observed and  
402 measured in HNs. To independently validate the correlation between LGE and neuronal  
403 maturity, we also treated primary rat neurons with Topotecan (TOPO), an inhibitor of  
404 Topoisomerase I known to reduce LGE in neurons (King et al., 2013; Mabb et al., 2016, 2014).  
405 Primary rat neurons treated with TOPO (blue) were found to display a reduction in LGE when  
406 compared to the control condition (DMSO, red) (Figures 7E-F) while the TOPO-treated cells still  
407 maintained the expression of other neuronal markers such as *Map2*, *Actl6b*, *Rbfox3* and *Dcx*  
408 (Figure 7G). To further assess the consequences of LGE reduction in neurons, we measured  
409 electrophysiological properties using a microelectrode array (MEA). TOPO-treated neurons  
410 exhibited altered electrophysiological properties compared to DMSO control, including reduced  
411 mean firing rate, mean burst frequency, and number of spikes per burst (Figures 7H-I),  
412 demonstrating that LGE is a transcriptomic feature related to the functional maturity of neurons.  
413 Therefore, our results support the notion that miR-124, in synergy with ELAVL3, promote  
414 neuronal maturity by positively regulating their target genes, as evidenced by their effect on LGE  
415 in human neurons. Based on PTBP2, we delineated a mechanism on how miR-124 and ELAVL3  
416 can promote the expression of their targets and we anticipate that some of the additional  
417 identified long genes important for neuronal differentiation and function are likely upregulated in  
418 a similar manner.

419

## 420 **Discussion**

421 In the present study, we uncovered the role of miR-124 in the upregulation of genes associated  
422 with neuronal differentiation and function during the neuronal conversion of human fibroblasts.  
423 This finding provides insights into the function of miRNAs in addition to their canonical role as

424 a repressor of downstream target genes. Of the bound AGO transcripts are *bona fida* miR-124  
425 target genes in which the 3'UTRs can be repressed in a non-neuronal context, but reverses upon  
426 neuronal induction. By examining the mutually exclusive regulation of *PTBP1* and *PTBP2*, we  
427 reveal how miR-124 plays a bifunctional role depending on the sequence composition at the  
428 3'UTR, the availability of neuronal ELAVLs, and the interaction with AGOs to mediate the  
429 switching of PTB homolog expression during the neuronal conversion of HAFs. Although we  
430 focus specifically on the interplay between miR-124 and ELAVL3 for *PTBP2* upregulation,  
431 future studies should also examine if similar mechanism is used to promote other identified  
432 neuronal transcripts or if other RBPs can also synergize with AGOs for such target gene  
433 regulation. For example, FXR1, an RBP, has been shown in previous studies to interact with  
434 AGOs to facilitate gene expression in non-neuronal cells (Truesdell et al., 2012; Vasudevan et  
435 al., 2007; Vasudevan and Steitz, 2007).

436 The selective role of ELAVL3, and not ubiquitous ELAVL1, in mediating *PTBP2*  
437 induction in neurons highlights the functional specificity of ELAVL family members in neurons.  
438 Like ELAVL3, ELAVL1 binds AREs and has been shown to interact with RISC components  
439 (Kim et al., 2009; Vasudevan and Steitz, 2007). Although different studies reveal opposing  
440 consequence of RISC and ELAVL family interaction on target genes, downstream functional  
441 output of AGO-ELAVL likely depends on not only the concurrent availability of RBP and target  
442 transcript, but also the 3'UTR sequence. Our results define the functional specificity inherent in  
443 ELAVL3 that cannot be replaced by ELAVL1, especially for regulating *PTBP2* expression with  
444 miR-124 in neurons. We found that the specificity is, at least in part, driven by the hinge region  
445 inferred by the region-swapping experiments between ELAVL1 and ELAVL3. As there is no  
446 known ARE recognition unique to each ELAVL family member, it is likely that interactors  
447 associating with the hinge region may be regulating ELAVL specificity and targeting (Fujiwara  
448 et al., 2012; Hinman et al., 2013).

449 To investigate if the synergism of miR-124 and nELAVLs for transcript stabilization and  
450 activation can be generalized to other neuronal transcripts beyond *PTBP2* outside the conversion  
451 system, we also knockdown miR-124 and ELAVL3 in primary human neurons. Our results  
452 indicate that several neuronal transcripts are induced by miR-124 and ELAVL3 that are critical  
453 for neuronal program. Furthermore, by examining existing nELAVL HITS-CLIP datasets in the  
454 human brain (Scheckel et al., 2016), we uncovered that miR-124- and nELAVL-mediated  
455 upregulation of target transcripts may not be a unique occurrence to *PTBP2*, but likely an  
456 overlooked mechanism that maintains gene expression in neurons. Interestingly, as we identified  
457 numerous neuronal genes to be targets of miR-124, such as *MAP2*, *CAMK1D*, and *SEMA6A*, we  
458 argue that miR-124 may be critical for enhancing the overall neuronal program as measured by  
459 the reduced sodium current, and neurite length and branches through its regulation on long  
460 genes. By chemically inhibiting LGE in rat neurons, mimicking the transcriptomic phenotype  
461 observed in HNs with reduce miR-124 and ELAVL3 activity, we observed a variety of altered  
462 electrical properties. This finding also indicates that miR-9/9\*-124 is highly neurogenic as these  
463 miRNAs not only allow for the conversion of HAFs into neurons (Abernathy et al. 2017; Yoo et  
464 al. 2011), but also enhanced the expression of neuronal markers, such as *MAP2*, when  
465 overexpressed during neuronal differentiation of human pluripotent stem cell-derived neurons  
466 (Ishikawa et al., 2020; Sun et al., 2016). Although further tests are required to see if all the  
467 identified transcripts targeted by both miR-124 and nELAVLs share the same mechanism as  
468 *PTBP2*, our loss-of-function results from in both reprogramming and primary human neuron  
469 systems, and its effect on other neuronal genes lend support to the general role of miR-124 as a  
470 positive regulator of select target genes in neurons. Future experiments taking a closer look at

471 RNA structure, motif proximity with RBPs, and additional interacting proteins will provide  
472 further mechanistic insights to how a single miRNA can simultaneously repress and activate  
473 different transcripts in a cell context-dependent manner.

474 Our study offers insights into the bifunctional mode of miR-124 conferring miRNAs as a  
475 reprogramming effector that can contribute to the neuronal program by upregulating specific  
476 neuronal genes. As miRNAs have been typically checked for their targets in non-neuronal cell  
477 lines, it is plausible that the dual-mode of miRNAs may not be unique to miR-124 in neurons,  
478 but instead utilized and altered in other cellular contexts with the help of cell type-specific RBPs.  
479 The governance of miRNA activity by the sequences within 3'UTR highlights the role of cell  
480 type-specific RBPs as core regulators of gene expression.

481  
482

## 483 **Materials and Methods**

### 484 **Cell culture**

485 Primary human fibroblasts used in this study was from a 22-year-old female (GM02171, NIGMS  
486 Coriell Institute for Medical Research) while human neonatal fibroblasts (ScienCell, 2310) was  
487 used exclusively for the HITS-CLIP experiment. Fibroblasts were maintained in high glucose  
488 Dulbecco's Modified Eagle Medium (Gibco, 11960044) containing 10% FBS (Gibco,  
489 10437028), MEM non-essential amino acids (Gibco, 11140050), sodium pyruvate (Gibco,  
490 11360070), GlutaMAX (Gibco, 35050061), HEPES (Gibco, 15630080), penicillin-streptomycin  
491 (Gibco, 15130122), and 2-mercaptoethanol (Gibco, 21985023) at 37°C. Primary human neurons  
492 were obtained commercially (ScienCell, 1520) with gender and age of the source undisclosed  
493 Human neurons were maintained in neuronal media (NM; ScienCell, 1521) at 37°C. E18 rat  
494 cortex (BrainBits®, FSDECX1M) were grown in STEMdiff™ Neural Induction Medium  
495 (STEMCELL Technologies, 05835).

496 Lenti-X 293T (Clontech, 632180) cells were maintained in high glucose Dulbecco's  
497 Modified Eagle Medium (Gibco, 11960044) containing 10% FBS (Gibco, 10437028), MEM  
498 non-essential amino acids (Gibco, 11140050), sodium pyruvate (Gibco, 11360070), GlutaMAX  
499 (Gibco, 35050061), HEPES (Gibco, 15630080), penicillin-streptomycin (Gibco, 15130122), and  
500 2-mercaptoethanol (Gibco, 21985023) at 37°C.

501

### 502 **MiR-9/9\*-124-mediated neuronal conversion**

503 To initiate reprogramming, doxycycline-inducible pT-BclXL-miR-9/9\*-124 (Addgene, 60857)  
504 and reverse tetracycline-controlled transactivator rtTA (Addgene, 66810) lentivirus with 8  
505 ug/mL polybrene (Sigma, H9268) was added to a plate of confluent fibroblasts and spinfected at  
506 37°C for 30 min at 1,000xG. Full media change with 1 µg/mL doxycycline (DOX; Sigma-  
507 Aldrich, D9891) occurred the following day. Two days following transduction, cells underwent  
508 another media change supplemented with DOX and respective antibiotics (Puromycin, Life  
509 Technologies, A11138-03; Blastidicin S HCl, Life Technologies, A11139-03). Five days after  
510 transduction, cells were plated onto poly-l-ornithine (Sigma-Aldrich, P4957), fibronectin  
511 (Sigma-Aldrich, F4759), and laminin (Sigma-Aldrich, L2020) coated coverslips or onto 10cm<sup>2</sup>  
512 Primaria plates (Corning, 353803) followed by full media switch to neuronal media (NM;  
513 ScienCell, 1521) the next day supplemented with 200 µM dibutyl-cyclic AMP (cAMP; Sigma-  
514 Aldrich, D0627), 1 mM valproic acid (VPA; Sigma Aldrich, P4543), 10 ng/mL human BDNF  
515 (PeproTech, 450-02), 10 ng/mL human NT-3 (PeproTech, 450-03), 1 µM retinoic acid (RA;  
516 Sigma-Aldrich, R2625), RevitaCell supplement (Gibco, A2644501), and antibiotics. DOX was  
517 supplemented every 2 days while half media changes occurred every 4 days until day 30.

518

### 519 **Plasmids and cloning**

520 For luciferase assay, full length 3'UTR of target transcripts were cloned and ligated into  
521 pmirGLO vector. For mutagenizing miR-124 target sites, QuikChange XL site-directed  
522 mutagenesis kit (Agilent, 200516) was used according to the manufacturer's protocol. Using the  
523 same UTR sequences, 3'UTR was attached immediately downstream of a destabilized EGFP  
524 reporter and subcloned into lentiviral vector. Sequences for shRNAs were synthesized through  
525 Integrated DNA Technologies, annealed, and ligated into the pLKO.1 vector (Addgene, 8453 or  
526 26655). Overexpression vectors of either lentiviral (N106 or N174) or mammalian expression  
527 (pcDNA3.1+, Invitrogen, V79020) was cut using NotI cut site (NEB, R0189) for insert ligation.  
528 Tough decoy for miR-124 was synthesized (GeneScript) and subcloned into pLemir vector using  
529 MluI (NEB, R0198) and NotI sites.

530

### 531 **Lentivirus production**

532 Lentivirus was produced as previously described (Richner et al., 2015). Briefly, 1.5 µg pMD2.G,  
533 4.5 µg psPAX2, 6 µg of plasmid in lentiviral backbone, 600 µl Opti-MEM (Life Technologies,  
534 31985) and 48 µl of 2 mg/mL polyethyleneimine (PEI; Polysciences, 24765) were mixed and  
535 transfected into Lenti-X 293T (Clontech, 632180) plated at  $6 \times 10^6$  cells per 10 cm<sup>2</sup> dish. Media  
536 was changed the following day, and viral supernatant was collected, filtered and spun at  
537 70,000xG for 2 hr at 4°C two days later. The viral pellet collected per 10 cm<sup>2</sup> dish was  
538 resuspended in 1 mL PBS.

539

### 540 **Immunostaining analysis**

541 Cells were fixed with 4% paraformaldehyde (PFA; Electron Microscopy Sciences, 15710) for 20  
542 mins at room temperature (RT) followed by three washes with PBS. Cells were permeabilized  
543 and blocked in 0.3% TritonX-100, 2% normal goat serum (NGS; Jackson ImmunoResearch  
544 Laboratories, 005-000-121) and 5% bovine serum albumin (BSA; Sigma-Aldrich, A7906) in  
545 PBS for 1 hr at RT prior to incubation with primary antibodies overnight at 4°C. After three  
546 washes with PBS, cells were incubated with respective secondary antibodies for 1 hr at RT.  
547 Coverslips were mounted onto coverslides with ProLong Gold antifade reagent (Invitrogen,  
548 P36934) for imaging using Leica SP5X white light laser confocal system with Leica Application  
549 Suite (LAS) Advanced Fluorescence. See Supplemental Table S4 for a list of antibodies used.

550

### 551 **SYTOX assay**

552 SYTOX assay was performed as previously described (Victor et al., 2018). Briefly, 0.1 µM  
553 SYTOX gene nucleic acid stain (Invitrogen, S7020) and 1 µl/mL of Hoeschst 33342 (Thermo  
554 Scientific, 66249) were added into cell medium. Samples were incubated for at least 15 mins in  
555 37°C prior to imaging. Images were taken using Leica DMI 4000B inverted microscope with  
556 Leica Application Suite (LAS) Advanced Fluorescence.

557

### 558 **Luciferase assay**

559 HEK 293 cells plated in 96-well plate were transfected with 100 ng of pSilencer-miRNA, 100 ng  
560 of pmirGLO containing 3'UTR of interest, and PEI (Polysciences, 24765) with Opti-MEM (Life  
561 Technologies, 31985). Forty-eight hours after transfection, luciferase activity was assayed using  
562 Dual-Glo luciferase assay system (Promega, E2920) according to the manufacturer's protocol  
563 using Synergy H1 Hybrid plate reader (BioTek). Luciferase activity was obtained by normalizing

564 firefly luminescence to renilla luminescence (luciferase activity = firefly/renilla) followed by  
565 normalizing to respective pSilencer-miR-NS control.

566

### 567 **Flow cytometry**

568 Destabilized EGFP reporter with or without 3'UTR of interest was transduced into HEK 293  
569 cells to establish a stable reporter containing cell line with Blasticidin S HCl (Life Technologies,  
570 A11139-03) selection. The day following transduction with miR-9/9\*-124 lentivirus, media was  
571 changed with the addition of DOX (Sigma-Aldrich, D9891). At day 3, media change was  
572 supplemented with DOX and puromycin (Life Technologies, A11138-03). DOX was  
573 supplemented every 2 days following transduction. At day 10, cells were imaged, and collected  
574 for flow cytometry. Briefly, cells were collected in PBS and incubated with propidium iodide  
575 (PI; Sigma-Aldrich, P4861) on ice until ready. Using FACSCalibur (BD Biosciences), all PI-  
576 negative cell population was obtained for the gating of GFP-negative and -positive cell  
577 population.

578

### 579 **Quantitative reverse transcription PCR**

580 Total RNA of cells was extracted using TRIzol Reagent (Invitrogen, 15596026). Reverse  
581 transcription was performed using SuperScript III first strand synthesis system for RT-PCR  
582 (Invitrogen, 18080-051) according to the manufacturer's protocol from fibroblasts,  
583 reprogrammed neurons, and human brain total RNA (Invitrogen, AM7962). Quantitative PCR  
584 was performed using SYBR Green PCR master mix (Applied Biosystems, 4309155) and  
585 StepOnePlus Real-Time PCR system (Applied Biosystems, 4376600) according to the  
586 manufacturer's protocol against target genes.

587

### 588 **HITS-CLIP**

589 AGO HITS-CLIP was performed on cells after 2 weeks into reprogramming of miR-NS or miR-  
590 9/9\*-124-expressing neonatal fibroblasts (ScienCell, 2310) at day 14 and day 21. Cells were  
591 harvested, UV-crosslinked, lysed, and processed according to Moore et al. 2014. Briefly, cross-  
592 linked cells were lysed and treated with RQ1 DNase (Promega, M6101) and RNaseA (Thermo).  
593 Complex containing AGO-miRNA-mRNA were immunoprecipitated overnight at 4°C with pan-  
594 AGO antibody. The immunoprecipitated complex was radio-labelled and extracted after running  
595 on NuPAGE gel (Thermo). RNA from the 130kDa band was extracted for sequencing using  
596 TruSeq Small RNA Library Preparation Kits (San Diego, CA). Samples were sequenced using  
597 Illumina HiSeq 2500 platform at the Genome Technology Access Center (GTAC) at Washington  
598 University School of Medicine, St. Louis.

599

### 600 **MiRNA Tough Decoy RNA-seq**

601 Total RNA was extracted from day 20 cells expressing miR-9/9\*-124 + TuD-miR-NS, and miR-  
602 9/9\*-124 + TuD-miR-124 using TRIzol Reagent (Invitrogen, 15596026) in combination with  
603 RNeasy micro kit (Qiagen, 74004). RNA quality (RIN  $\geq$  9.6) was determined with 2100  
604 Bioanalyzer (Agilent) and samples underwent low input Takara-Clontech SMARTer kit (Takara,  
605 639490) library preparation. Samples were sequenced using NovaSeq S4 and processed at the  
606 Genome Technology Access Center (GTAC) at Washington University School of Medicine, St.  
607 Louis. For human neurons, total RNA was extracted from HNs after 8 days of tough decoy and  
608 shRNA treatment using TRIzol Reagent (Invitrogen, 15596026) in combination with RNeasy  
609 micro kit (Qiagen, 74004). RNA quality (RIN  $\geq$  8.4) was determined with 2100 Bioanalyzer

610 (Agilent) and samples underwent TruSeq Stranded total RNA sequencing kit library preparation.  
611 Samples were sequenced using NovaSeq6000 through DNA Link (San Diego, CA).

612

### 613 **Human Clariom D Microarray**

614 For Human Clariom D Array (Affymetrix), total RNA was extracted from day 14 cells  
615 expressing miR-NS, miR-9/9\*-124 + shCTL, and miR-9/9\*-124 + shPTBP2 using TRIzol  
616 Reagent in combination with RNeasy mini kit (Qiagen, 74104). RNA quality (RIN > 9.6) was  
617 determined with 2100 Bioanalyzer and samples (biological duplicates each) underwent  
618 amplification and hybridization according to manufacturer's protocol by GTAC at Washington  
619 University School of Medicine, St. Louis.

620

### 621 **Immunoblot analysis**

622 Cells were lysed with sonication (Diagenode, UCD-200) in RIPA buffer (Thermo Scientific,  
623 89900) supplemented with protease inhibitor cocktail tablet (Roche, 04693132001). Protein  
624 concentration of cleared lysate was measured using Pierce BCA protein assay kit (Thermo  
625 Scientific, 23227) and read with Synergy H1 Hybrid plate reader (BioTek). Lysate and sample  
626 buffer (Life Technologies, NP0008) were boiled, separated with Bis-Tris gels, and transferred to  
627 nitrocellulose membrane (GE Healthcare Life Sciences, 10600006). Membrane was blocked with  
628 5% milk for 1 hr at RT and incubated with primary antibody overnight at 4°C. After three  
629 washes of TBST (1X TBS and 0.1% Tween-20), the membrane was incubated with respective  
630 horseradish peroxidase-conjugated antibody for 1 hr at RT followed by three washes with TBST.  
631 Blots were developed with ECL system (Thermo Scientific, 34580) and imaged or developed  
632 onto film. See Supplemental Table S3 for a list of antibodies used.

633

### 634 **Immunoprecipitation analysis**

635 Cells were lysed with sonication (Diagenode, UCD-200) in IP buffer (20 mM HEPES, 150 mM  
636 NaCl, 10% glycerol, 5 mM EDTA, 1% Triton X-100) supplemented with protease inhibitor  
637 cocktail tablet (Roche, 04693132001). Cleared lysate was incubated with anti-FLAG M2  
638 magnetic beads (Sigma-Aldrich, M8823) overnight with rotation at 4°C. The beads were washed  
639 three times with IP buffer and bound proteins were boiled and eluted with sample buffer (Life  
640 Technologies, NP0008), separated with Bis-Tris gels, and immunoblotted.

641

### 642 **RNA-IP**

643 Cells were lysed with sonication (Diagenode, UCD-200) in IP buffer (20 mM HEPES, 150 mM  
644 NaCl, 10% glycerol, 5 mM EDTA, 1% Triton X-100) supplemented with protease inhibitor  
645 cocktail tablet (Roche, 04693132001). Cleared lysate was incubated with anti-FLAG magnetic  
646 beads (Sigma-Aldrich, M8823) overnight with rotation at 4°C beads. The beads were washed  
647 three times with IP buffer and resuspended in 90 ul of IP buffer with proteinase K (NEB,  
648 P8107S) for 30 mins at 37°C. To extract RNA, 1 mL of TRIzol Reagent (Invitrogen, 15596026)  
649 was added to the bead slurry. Final RNA was DNase I (Invitrogen, 18068015) treated prior to  
650 RT-qPCR.

651

### 652 **Electrophysiology**

653 Whole-cell patch-clamp recordings were performed as previously described (Victor et al., 2018).  
654 Briefly, HNs (ScienCell, 1521) were recording within 8 to 10 days after tough decoy and shRNA  
655 transduction. Recordings were acquired using pCLAMP 10 software, multiplclamp 700B  
656 amplifier, and Digidata 1550 digitizer (Molecular Devices, CA). Glass electrode pipettes were

657 pulled from borosilicate glass (1B120F-4, World Precision) to obtain pipette resistance ranging  
658 from 5 – 8 M $\Omega$  using next generation micropipette puller (P-1000, Sutter Instrument). External  
659 solution is consist of 140 mM NaCl, 3 mM KCl, 10 mM Glucose, 10 mM HEPES, 2 mM CaCl<sub>2</sub>  
660 and 1 mM MgCl<sub>2</sub>, and internal solution is consist of 130 mM K-Gluconate, 4 mM NaCl, 2 mM  
661 MgCl<sub>2</sub>, 1 mM EGTA, and 10 mM HEPES (adjusted to pH 7.25 with KOH) were used for  
662 recording. For all recordings, the membrane potentials were held at -65 mV.

663

#### 664 **Microelectrode array**

665 E18 rat cortical neurons (BrainBits, FSDECX1M) were plated onto a 24-well cell culture  
666 microelectrode array plate (Axion Biosystems, M384-tMEA-24W). Prior to plating, 1 ml of  
667 sterile water and 10  $\mu$ l of PEI (Sigma-Aldrich, 03880) at 0.5% diluted in 0.1 M HEPES pH 8.0  
668 (Caymen Chemical Company, 700014) was added to the center of each well. After incubating  
669 overnight at 37 °C, each well was washed 4x with sterile water, and allowed to dry for 15  
670 minutes. 10  $\mu$ l of Laminin (Sigma-Aldrich, L2020) at 10  $\mu$ g/mL diluted in cold DMEM/F-12  
671 (ThermoFisher, 11320082) was added to each well and incubated at 37 °C for 2 hours. Laminin  
672 was aspirated prior to plating neurons. 24 hours after plating, neurons were cultured in BrainPhys  
673 Neuronal Medium and SM1 supplement (STEMCELL Technologies, 05792) with either  
674 Topotecan (Sigma-Aldrich, T2705) at a final concentration of 300 nM in DMSO (0.05% DMSO  
675 final concentration) or DMSO control for one week before recording electrophysiological  
676 activity using a Maestro MEA plate reader (Axion Biosystems).

677

#### 678 **GO enrichment analysis**

679 Gene ontology analyses were performed using Metascape (Tripathi et al., 2015) with minimum  
680 overlap of 3, P-value cutoff of 0.01, and minimum enrichment of 1.5. Entire gene list was used  
681 for each GO analysis.

682

#### 683 **RNAhybrid miRNA-target duplex analysis**

684 To predict the presence of miR-124-3p binding sites at HITS-CLIP peaks, peak sequences were  
685 extracted by on the genomic coordinates and processed through RNAhybrid (Rehmsmeier, 2004)  
686 against miR-124-3p miRNA sequence with at least a free energy threshold of -20 kcal/mol.

687

#### 688 **RBP binding analysis**

689 RNA-binding protein prediction database/software, RBPDB (Cook et al., 2011), RBPmap (Paz et  
690 al., 2014), and beRBP (Yu et al., 2018) for *PTBP2* 3'UTR sequence were used. Default criteria  
691 were selected for all three software for non-bias prediction of any human RBP motifs.

692

#### 693 **Neurite length measurement**

694 Images of HNs marked by TurboRFP were processed through CellProfiler 3.1.9 (McQuin et al.,  
695 2018). Briefly, neurite feature was enhanced prior to the identification of primary object or soma  
696 between 25 – 100 pixel unit in diameter, followed by the identification of secondary object based  
697 on neurite feature. A morphological skeleton was made based on overlaying the identified  
698 objects and mean neurite lengths and branches were then measured using measure object  
699 skeleton module.

700

#### 701 **LONGO analysis**

702 LGE for human and rat neurons were determined by through the LONGO platform (McCoy et  
703 al., 2018) . LONGO analysis output of gene expression (CPM) over gene length was used to  
704 generate the LONGO plot.

705

## 706 **Data Analyses**

707 AGO HITS-CLIP reads for miR-NS and miR-9/9\*-124-expressing cells at least two  
708 weeks into reprogramming were trimmed and aligned to human genome hg38 using STAR with  
709 default parameters. Differential peaks between miR-9/9\*-124 and miR-NS conditions were  
710 detected using MACS (Feng et al., 2012; Zhang et al., 2008) with the following criteria: mfold  
711 bound of 5 – 50, fragment size of 100, and FDR > 0.05. HITS-CLIP datasets will be publicly  
712 available.

713 RNA-seq for day 20 miNs expressing either CTL TuD-miR-NS or TuD-miR-124 was  
714 analyzed by GTAC's RNA-seq pipeline. Briefly, reads were aligned to hg38 with STAR and  
715 processed through EdgeR (Robinson et al., 2010) to obtain differentially expressed genes with  
716 adj. p-value of < 0.01. RNA-seq dataset consisting of TuD-miR-NS and TuD-miR-124 at day 20  
717 will be publicly available.

718 RNA-seq for HNs treated with either CTL or tough decoy against miR-124 and shRNA  
719 against ELAVL3 (KD) was aligned through Partek® Flow® software (Partek Inc., 2020) to  
720 generate gene counts. Briefly, reads were aligned to hg38 with STAR and processed through  
721 EdgeR (Robinson et al., 2010) to obtain differentially expressed genes with adj. p-value of <  
722 0.05 and Log<sub>2</sub>FC of ≤ -1 and ≥ 1. RNA-seq dataset consisting of CTL and KD treatments from  
723 HNs will be publicly available.

724 RNA-seq for primary rat neurons treated with either DMSO or Topotecan (TOPO) were  
725 aligned to the Ensembl release 76 top-level assembly with STAR. Transcript counts were  
726 produced by Sailfish version 0.6.3. All gene-level and transcript counts were then imported into  
727 the R/Bioconductor package EdgeR and TMM normalization size factors were calculated to  
728 adjust samples for differences in library size. RNA-seq dataset consisting of DMSO and TOPO  
729 treatments from rat neurons will be publicly available.

730 Human Clariom D Array data was analyzed using manufacturer's software, Expression  
731 Console followed by Transcriptome Analysis Console (TAC). For gene level analysis, genes  
732 comparing miR-9/9\*-124 vs miR-NS linear fold change of ≥ 1.5 and ANOVA P < 0.05 were  
733 considered to upregulated in neuronal conditions. For splicing analysis, splicing events with  
734 linear splicing index ≤ -2 and ≥ 2, ANOVA P < 0.05 were considered significant splicing events.  
735 Human Clariom D array dataset consisting of miR-NS, miR-9/9\*-124 with shCTL, and miR-  
736 9/9\*-124 with shPTBP2 at day 14 will be publicly available.

737

## 738 **Author Contributions**

739 Y.L.L. conducted experiments shown in Figures 2-7 and associated supplementary Figures 1, 3-  
740 8. Y.J.L. conducted experiments shown in Figure 1 and supplementary Figure 2. M.J.M.  
741 conducted experiments shown in Figure 7. A.S.Y. supervised the study. Y.L.L. and A.S.Y. wrote  
742 the manuscript.

743

## 744 **Acknowledgements**

745 We thank the GTAC at Washington University for the sequencing service and support, and flow  
746 Cytometry Core at Washington University for equipment use. We thank We thank P. Gontarz,  
747 for the bioinformatics analysis of AGO HITS-CLIP, D. Annamalai and A. H. Kim for the help  
748 with tough decoy designs, M. Victor for the help with electrophysiology, and K. Cates and L.



749 Capano for the helpful suggestions with the manuscript. Y.L.L. is supported by the LIFENAD  
750 Fellowship. M.J.M. was supported by an IPNG fellowship (T32GM081739; Barch, PI). This  
751 study was supported through awards and funds to A.S.Y by the Andrew B. and Virginia C. Craig  
752 Faculty Fellowship endowment, NIH Director's Innovator Award (DP2NS083372), Presidential  
753 Early Career Award for Scientists and Engineers (PECASE), and NIH (RF1AG056296 and  
754 R01NS107488).

755

## 756 **Declaration of Interests**

757 The authors declare no competing interest.

758

## 759 **References**

- 760 Abernathy DG, Kim WK, McCoy MJ, Lake AM, Ouwenga R, Lee SW, Xing X, Li D, Lee HJ,  
761 Heuckeroth RO, Dougherty JD, Wang T, Yoo AS. 2017a. MicroRNAs Induce a  
762 Permissive Chromatin Environment that Enables Neuronal Subtype-Specific  
763 Reprogramming of Adult Human Fibroblasts. *Cell Stem Cell* **21**:332-348.e9.  
764 doi:10.1016/j.stem.2017.08.002
- 765 Bak RO, Hollensen AK, Primo MN, Sorensen CD, Mikkelsen JG. 2013. Potent microRNA  
766 suppression by RNA Pol II-transcribed "Tough Decoy" inhibitors. *RNA* **19**:280-293.  
767 doi:10.1261/rna.034850.112
- 768 Ballas N, Grunseich C, Lu DD, Speh JC, Mandel G. 2005. REST and Its Corepressors Mediate  
769 Plasticity of Neuronal Gene Chromatin throughout Neurogenesis. *Cell* **121**:645-657.  
770 doi:10.1016/j.cell.2005.03.013
- 771 Boutz PL, Stoilov P, Li Q, Lin C-H, Chawla G, Ostrow K, Shiue L, Ares M, Black DL. 2007. A  
772 post-transcriptional regulatory switch in polypyrimidine tract-binding proteins  
773 reprograms alternative splicing in developing neurons. *Genes & Development* **21**:1636-  
774 1652. doi:10.1101/gad.1558107
- 775 Cook KB, Kazan H, Zuberi K, Morris Q, Hughes TR. 2011. RBPDB: a database of RNA-  
776 binding specificities. *Nucleic Acids Research* **39**:D301-D308. doi:10.1093/nar/gkq1069
- 777 Feng J, Liu T, Qin B, Zhang Y, Liu XS. 2012. Identifying ChIP-seq enrichment using MACS.  
778 *Nat Protoc* **7**:1728-1740. doi:10.1038/nprot.2012.101
- 779 Fujiwara T, Fukao A, Sasano Y, Matsuzaki H, Kikkawa U, Imataka H, Inoue K, Endo S,  
780 Sonenberg N, Thoma C, Sakamoto H. 2012. Functional and direct interaction between  
781 the RNA binding protein HuD and active Akt1. *Nucleic Acids Research* **40**:1944-1953.  
782 doi:10.1093/nar/gkr979
- 783 Gabel HW, Kinde B, Stroud H, Gilbert CS, Harmin DA, Kastan NR, Hemberg M, Ebert DH,  
784 Greenberg ME. 2015. Disruption of DNA-methylation-dependent long gene repression in  
785 Rett syndrome. *Nature* **522**:89-93. doi:10.1038/nature14319
- 786 Haraguchi T, Ozaki Y, Iba H. 2009. Vectors expressing efficient RNA decoys achieve the long-  
787 term suppression of specific microRNA activity in mammalian cells. *Nucleic Acids*  
788 *Research* **37**:e43-e43. doi:10.1093/nar/gkp040
- 789 Hinman MN, Zhou H-L, Sharma A, Lou H. 2013. All three RNA recognition motifs and the  
790 hinge region of HuC play distinct roles in the regulation of alternative splicing. *Nucleic*  
791 *Acids Research* **41**:5049-5061. doi:10.1093/nar/gkt166
- 792 Iadevaia V, Gerber A. 2015. Combinatorial Control of mRNA Fates by RNA-Binding Proteins  
793 and Non-Coding RNAs. *Biomolecules* **5**:2207-2222. doi:10.3390/biom5042207
- 794 Ince-Dunn G, Okano HJ, Jensen KB, Park W-Y, Zhong R, Ule J, Mele A, Fak JJ, Yang C, Zhang  
795 C, Yoo J, Herre M, Okano H, Noebels JL, Darnell RB. 2012. Neuronal Elav-like (Hu)

- 796 Proteins Regulate RNA Splicing and Abundance to Control Glutamate Levels and  
797 Neuronal Excitability. *Neuron* **75**:1067–1080. doi:10.1016/j.neuron.2012.07.009
- 798 Ishikawa M, Aoyama T, Shibata S, Sone T, Miyoshi H, Watanabe H, Nakamura M, Morota S,  
799 Uchino H, Yoo AS, Okano H. 2020. miRNA-Based Rapid Differentiation of Purified  
800 Neurons from hPSCs Advancetowards Quick Screening for Neuronal Disease  
801 Phenotypes In Vitro. *Cells* **9**:532. doi:10.3390/cells9030532
- 802 Jiang P, Collier H. 2012. Functional Interactions Between microRNAs and RNA Binding  
803 Proteins. *MicroRNA e* **1**:70–79. doi:10.2174/2211536611201010070
- 804 Kim HH, Kuwano Y, Srikantan S, Lee EK, Martindale JL, Gorospe M. 2009. HuR recruits let-  
805 7/RISC to repress c-Myc expression. *Genes & Development* **23**:1743–1748.  
806 doi:10.1101/gad.1812509
- 807 King IF, Yandava CN, Mabb AM, Hsiao JS, Huang H-S, Pearson BL, Calabrese JM, Starmer J,  
808 Parker JS, Magnuson T, Chamberlain SJ, Philpot BD, Zylka MJ. 2013. Topoisomerases  
809 facilitate transcription of long genes linked to autism. *Nature* **501**:58–62.  
810 doi:10.1038/nature12504
- 811 Lee SW, Oh YM, Lu Y-L, Kim WK, Yoo AS. 2018. MicroRNAs Overcome Cell Fate Barrier by  
812 Reducing EZH2-Controlled REST Stability during Neuronal Conversion of Human Adult  
813 Fibroblasts. *Developmental Cell* **46**:73–84.e7. doi:10.1016/j.devcel.2018.06.007
- 814 Lessard J, Wu JI, Ranish JA, Wan M, Winslow MM, Staahl BT, Wu H, Aebersold R, Graef IA,  
815 Crabtree GR. 2007. An Essential Switch in Subunit Composition of a Chromatin  
816 Remodeling Complex during Neural Development. *Neuron* **55**:201–215.  
817 doi:10.1016/j.neuron.2007.06.019
- 818 Li Q, Zheng S, Han A, Lin C-H, Stoilov P, Fu X-D, Black DL. 2014. The splicing regulator  
819 PTBP2 controls a program of embryonic splicing required for neuronal maturation. *eLife*  
820 **3**. doi:10.7554/eLife.01201
- 821 Licatalosi DD, Yano M, Fak JJ, Mele A, Grabinski SE, Zhang C, Darnell RB. 2012. Ptbp2  
822 represses adult-specific splicing to regulate the generation of neuronal precursors in the  
823 embryonic brain. *Genes & Development* **26**:1626–1642. doi:10.1101/gad.191338.112
- 824 Lin K, Zhang S, Shi Q, Zhu M, Gao L, Xia W, Geng B, Zheng Z, Xu EY. 2018. Essential  
825 requirement of mammalian *Pumilio* family in embryonic development. *MBoC* **29**:2922–  
826 2932. doi:10.1091/mbc.E18-06-0369
- 827 Lu J, Ji H, Tang H, Xu Z. 2018. microRNA-124a suppresses PHF19 over-expression, EZH2  
828 hyper-activation, and aberrant cell proliferation in human glioma. *Biochemical and*  
829 *Biophysical Research Communications* **503**:1610–1617. doi:10.1016/j.bbrc.2018.07.089
- 830 Mabb AM, Kullmann PHM, Twomey MA, Miriyala J, Philpot BD, Zylka MJ. 2014.  
831 Topoisomerase 1 inhibition reversibly impairs synaptic function. *Proc Natl Acad Sci USA*  
832 **111**:17290–17295. doi:10.1073/pnas.1413204111
- 833 Mabb AM, Simon JM, King IF, Lee H-M, An L-K, Philpot BD, Zylka MJ. 2016. Topoisomerase  
834 1 Regulates Gene Expression in Neurons through Cleavage Complex-Dependent and -  
835 Independent Mechanisms. *PLoS ONE* **11**:e0156439. doi:10.1371/journal.pone.0156439
- 836 Makeyev EV, Zhang J, Carrasco MA, Maniatis T. 2007. The MicroRNA miR-124 Promotes  
837 Neuronal Differentiation by Triggering Brain-Specific Alternative Pre-mRNA Splicing.  
838 *Molecular Cell* **27**:435–448. doi:10.1016/j.molcel.2007.07.015
- 839 McCoy MJ, Fire AZ. 2020. Intron and gene size expansion during nervous system evolution.  
840 *BMC Genomics* **21**:360. doi:10.1186/s12864-020-6760-4

- 841 McCoy MJ, Paul AJ, Victor MB, Richner M, Gabel HW, Gong H, Yoo AS, Ahn T-H. 2018.  
842 LONGO: an R package for interactive gene length dependent analysis for neuronal  
843 identity. *Bioinformatics* **34**:i422–i428. doi:10.1093/bioinformatics/bty243
- 844 McQuin C, Goodman A, Chernyshev V, Kametsky L, Cimini BA, Karhohs KW, Doan M, Ding  
845 L, Rafelski SM, Thirstrup D, Wiegraebe W, Singh S, Becker T, Caicedo JC, Carpenter  
846 AE. 2018. CellProfiler 3.0: Next-generation image processing for biology. *PLoS Biol*  
847 **16**:e2005970. doi:10.1371/journal.pbio.2005970
- 848 Moore MJ, Zhang C, Gantman EC, Mele A, Darnell JC, Darnell RB. 2014. Mapping Argonaute  
849 and conventional RNA-binding protein interactions with RNA at single-nucleotide  
850 resolution using HITS-CLIP and CIMS analysis. *Nat Protoc* **9**:263–293.  
851 doi:10.1038/nprot.2014.012
- 852 Neo WH, Yap K, Lee SH, Looi LS, Khandelia P, Neo SX, Makeyev EV, Su I. 2014. MicroRNA  
853 miR-124 Controls the Choice between Neuronal and Astrocyte Differentiation by Fine-  
854 tuning Ezh2 Expression. *Journal of Biological Chemistry* **289**:20788–20801.  
855 doi:10.1074/jbc.M113.525493
- 856 Okano HJ, Darnell RB. 1997. A Hierarchy of Hu RNA Binding Proteins in Developing and  
857 Adult Neurons. *The Journal of Neuroscience* **17**:3024–3037.  
858 doi:10.1523/JNEUROSCI.17-09-03024.1997
- 859 Packer AN, Xing Y, Harper SQ, Jones L, Davidson BL. 2008. The Bifunctional microRNA miR-  
860 9/miR-9\* Regulates REST and CoREST and Is Downregulated in Huntington’s Disease.  
861 *Journal of Neuroscience* **28**:14341–14346. doi:10.1523/JNEUROSCI.2390-08.2008
- 862 Partek Inc. 2020. Partek Flow. St. Louis.
- 863 Paz I, Kosti I, Ares M, Cline M, Mandel-Gutfreund Y. 2014. RBPmap: a web server for mapping  
864 binding sites of RNA-binding proteins. *Nucleic Acids Research* **42**:W361–W367.  
865 doi:10.1093/nar/gku406
- 866 Plass M, Rasmussen SH, Krogh A. 2017. Highly accessible AU-rich regions in 3’ untranslated  
867 regions are hotspots for binding of regulatory factors. *PLOS Computational Biology*  
868 **13**:e1005460. doi:10.1371/journal.pcbi.1005460
- 869 Rehmsmeier M. 2004. Fast and effective prediction of microRNA/target duplexes. *RNA*  
870 **10**:1507–1517. doi:10.1261/rna.5248604
- 871 Richner M, Victor MB, Liu Y, Abernathy D, Yoo AS. 2015. MicroRNA-based conversion of  
872 human fibroblasts into striatal medium spiny neurons. *Nature Protocols* **10**:1543–1555.  
873 doi:10.1038/nprot.2015.102
- 874 Robinson MD, McCarthy DJ, Smyth GK. 2010. edgeR: a Bioconductor package for differential  
875 expression analysis of digital gene expression data. *Bioinformatics* **26**:139–140.  
876 doi:10.1093/bioinformatics/btp616
- 877 Scheckel C, Drapeau E, Frias MA, Park CY, Fak J, Zucker-Scharff I, Kou Y, Haroutunian V,  
878 Ma’ayan A, Buxbaum JD, Darnell RB. 2016. Regulatory consequences of neuronal  
879 ELAV-like protein binding to coding and non-coding RNAs in human brain. *eLife* **5**.  
880 doi:10.7554/eLife.10421
- 881 Schoenherr C, Anderson D. 1995. The neuron-restrictive silencer factor (NRSF): a coordinate  
882 repressor of multiple neuron-specific genes. *Science* **267**:1360–1363.  
883 doi:10.1126/science.7871435
- 884 Spassov DS, Jurecic R. 2002. Cloning and comparative sequence analysis of PUM1 and PUM2  
885 genes, human members of the Pumilio family of RNA-binding proteinsq 10.
- 886 Staahl BT, Tang J, Wu W, Sun A, Gitler AD, Yoo AS, Crabtree GR. 2013. Kinetic Analysis of  
887 npBAF to nBAF Switching Reveals Exchange of SS18 with CREST and Integration with

- 888 Neural Developmental Pathways. *Journal of Neuroscience* **33**:10348–10361.  
889 doi:10.1523/JNEUROSCI.1258-13.2013
- 890 Sugino K, Hempel CM, Okaty BW, Arnson HA, Kato S, Dani VS, Nelson SB. 2014. Cell-Type-  
891 Specific Repression by Methyl-CpG-Binding Protein 2 Is Biased toward Long Genes.  
892 *Journal of Neuroscience* **34**:12877–12883. doi:10.1523/JNEUROSCI.2674-14.2014
- 893 Sun AX, Yuan Q, Tan S, Xiao Y, Wang D, Khoo ATT, Sani L, Tran H-D, Kim P, Chiew YS,  
894 Lee KJ, Yen Y-C, Ng HH, Lim B, Je HS. 2016. Direct Induction and Functional  
895 Maturation of Forebrain GABAergic Neurons from Human Pluripotent Stem Cells. *Cell*  
896 *Reports* **16**:1942–1953. doi:10.1016/j.celrep.2016.07.035
- 897 Tripathi S, Pohl MO, Zhou Y, Rodriguez-Frandsen A, Wang G, Stein DA, Moulton HM,  
898 DeJesus P, Che J, Mulder LCF, Yáñez E, Andenmatten D, Pache L, Manicassamy B,  
899 Albrecht RA, Gonzalez MG, Nguyen Q, Brass A, Elledge S, White M, Shapira S,  
900 Hacoen N, Karlas A, Meyer TF, Shales M, Gatorano A, Johnson JR, Jang G, Johnson T,  
901 Verschueren E, Sanders D, Krogan N, Shaw M, König R, Stertz S, García-Sastre A,  
902 Chanda SK. 2015. Meta- and Orthogonal Integration of Influenza “OMICs” Data Defines  
903 a Role for UBR4 in Virus Budding. *Cell Host & Microbe* **18**:723–735.  
904 doi:10.1016/j.chom.2015.11.002
- 905 Truesdell SS, Mortensen RD, Seo M, Schroeder JC, Lee JH, LeTonqueze O, Vasudevan S. 2012.  
906 MicroRNA-mediated mRNA Translation Activation in Quiescent Cells and Oocytes  
907 Involves Recruitment of a Nuclear microRNP. *Scientific Reports* **2**.  
908 doi:10.1038/srep00842
- 909 Tsutsui Ken, Tsutsui Kimiko, Sano K, Kikuchi A, Tokunaga A. 2001. Involvement of DNA  
910 Topoisomerase II $\beta$  in Neuronal Differentiation. *Journal of Biological Chemistry*  
911 **276**:5769–5778. doi:10.1074/jbc.M008517200
- 912 Vasudevan S, Steitz JA. 2007. AU-Rich-Element-Mediated Upregulation of Translation by  
913 FXR1 and Argonaute 2. *Cell* **128**:1105–1118. doi:10.1016/j.cell.2007.01.038
- 914 Vasudevan S, Tong Y, Steitz JA. 2007. Switching from Repression to Activation: MicroRNAs  
915 Can Up-Regulate Translation. *Science* **318**:1931–1934. doi:10.1126/science.1149460
- 916 Victor MB, Richner M, Hermansteyne TO, Ransdell JL, Sobieski C, Deng P-Y, Klyachko VA,  
917 Nerbonne JM, Yoo AS. 2014. Generation of Human Striatal Neurons by MicroRNA-  
918 Dependent Direct Conversion of Fibroblasts. *Neuron* **84**:311–323.  
919 doi:10.1016/j.neuron.2014.10.016
- 920 Victor MB, Richner M, Olsen HE, Lee SW, Monteys AM, Ma C, Huh CJ, Zhang B, Davidson  
921 BL, Yang XW, Yoo AS. 2018. Striatal neurons directly converted from Huntington’s  
922 disease patient fibroblasts recapitulate age-associated disease phenotypes. *Nature*  
923 *Neuroscience*. doi:10.1038/s41593-018-0075-7
- 924 Visvanathan J, Lee S, Lee B, Lee JW, Lee S-K. 2007. The microRNA miR-124 antagonizes the  
925 anti-neural REST/SCP1 pathway during embryonic CNS development. *Genes &*  
926 *Development* **21**:744–749. doi:10.1101/gad.1519107
- 927 Vuong JK, Lin C-H, Zhang M, Chen L, Black DL, Zheng S. 2016. PTBP1 and PTBP2 Serve  
928 Both Specific and Redundant Functions in Neuronal Pre-mRNA Splicing. *Cell Reports*  
929 **17**:2766–2775. doi:10.1016/j.celrep.2016.11.034
- 930 Watanabe M, Tsutsui Ken, Tsutsui Kimiko, Inoue Y. 1994. Differential expressions of the  
931 topoisomerase IIa and IIb mRNAs in developing rat brain. *Neuroscience Research*  
932 **19**:51–57.

- 933 Xue Y, Qian H, Hu J, Zhou B, Zhou Y, Hu X, Karakhanyan A, Pang Z, Fu X-D. 2016.  
934 Sequential regulatory loops as key gatekeepers for neuronal reprogramming in human  
935 cells. *Nature Neuroscience* **19**:807–815. doi:10.1038/nn.4297
- 936 Yoo AS, Staahl BT, Chen L, Crabtree GR. 2009. MicroRNA-mediated switching of chromatin-  
937 remodelling complexes in neural development. *Nature* **460**:642–646.  
938 doi:10.1038/nature08139
- 939 Yoo AS, Sun AX, Li L, Shcheglovitov A, Portmann T, Li Y, Lee-Messer C, Dolmetsch RE,  
940 Tsien RW, Crabtree GR. 2011. MicroRNA-mediated conversion of human fibroblasts to  
941 neurons. *Nature* **476**:228–231. doi:10.1038/nature10323
- 942 Yu H, Wang J, Sheng Q, Liu Q, Shyr Y. 2018. beRBP: binding estimation for human RNA-  
943 binding proteins. *Nucleic Acids Research*. doi:10.1093/nar/gky1294
- 944 Zhang Y, Liu T, Meyer CA, Eeckhoute J, Johnson DS, Bernstein BE, Nussbaum C, Myers RM,  
945 Brown M, Li W, Liu XS. 2008. Model-based Analysis of ChIP-Seq (MACS). *Genome*  
946 *Biol* **9**:R137. doi:10.1186/gb-2008-9-9-r137
- 947 Zheng S, Gray EE, Chawla G, Porse BT, O'Dell TJ, Black DL. 2012. PSD-95 is post-  
948 transcriptionally repressed during early neural development by PTBP1 and PTBP2.  
949 *Nature Neuroscience* **15**:381–388. doi:10.1038/nn.3026
- 950 Zhou S, Gao R, Hu W, Qian T, Wang N, Ding G, Ding F, Yu B, Gu X. 2014. miR-9 inhibits  
951 Schwann cell migration by targeting Cthrc1 following sciatic nerve injury. *Journal of*  
952 *Cell Science* **127**:967–976. doi:10.1242/jcs.131672
- 953

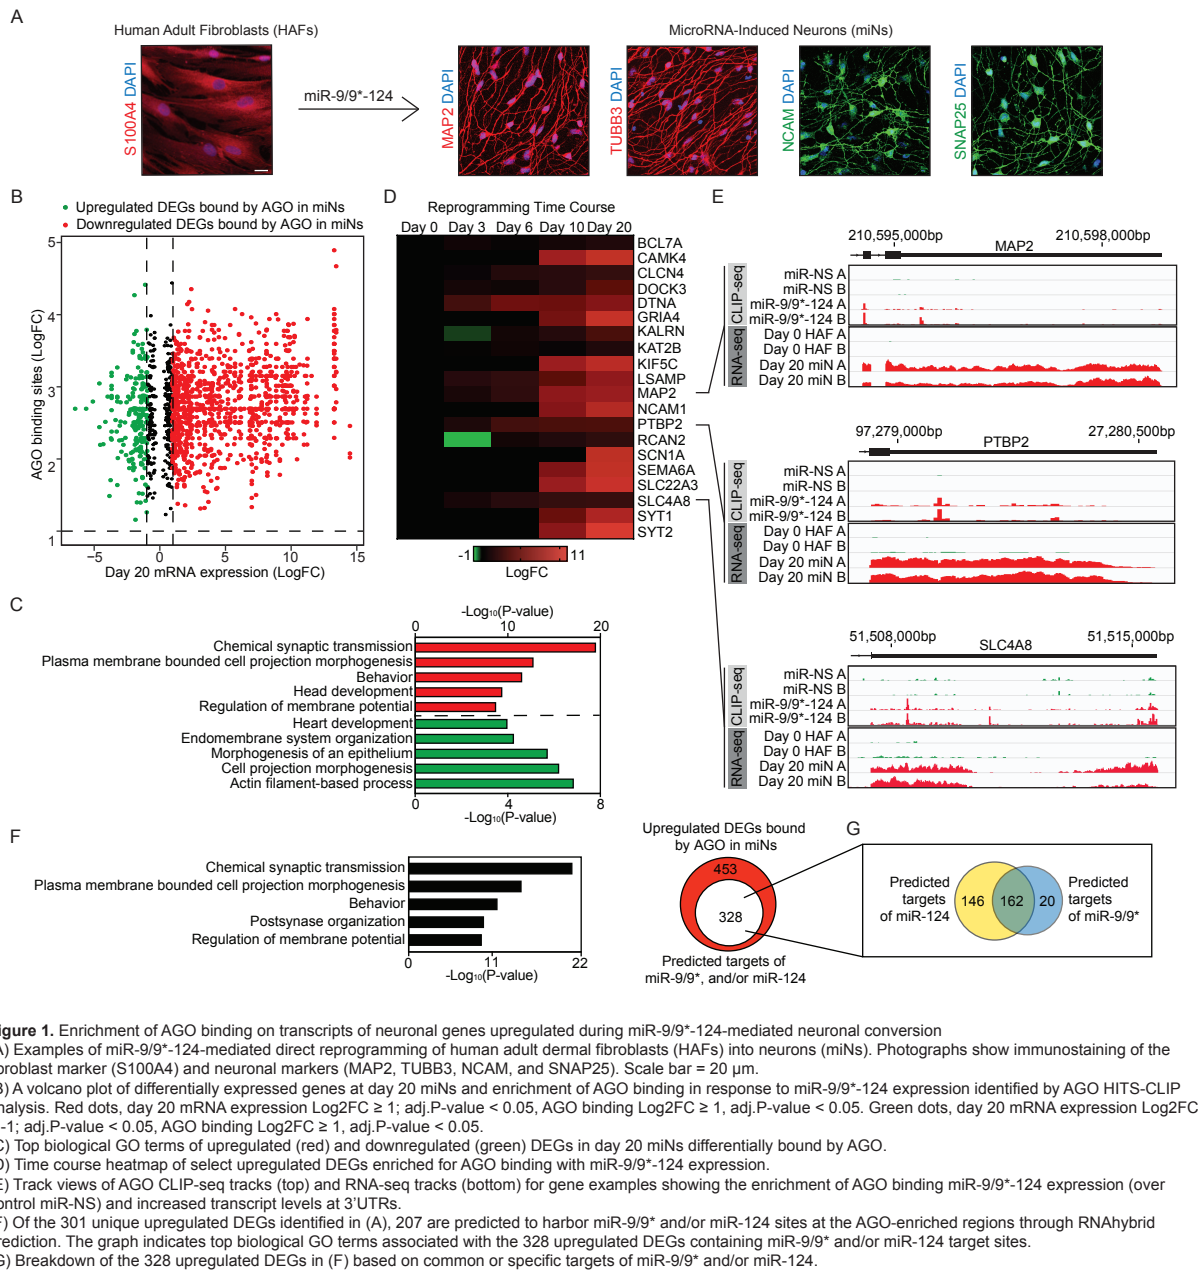

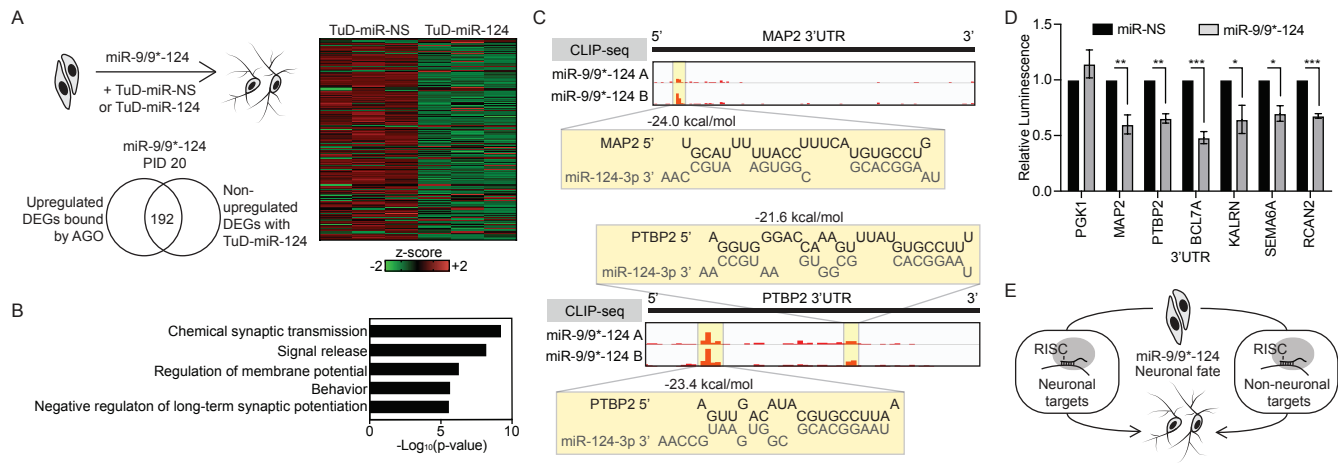

**Figure 2.** Identification of miR-124 target genes that fail to be upregulated upon the inhibition of miR-124 during miRNA-mediated neuronal conversion

(A) Left, miR-124 activity is reduced through the use of tough decoy (TuD). By overlapping with upregulated DEGs bound by AGO (Figure 1), 192 genes were identified as genes that fail to be increased upon the reduction of miR-124. Right, a heatmap of z-scores of the 192 genes from RNA-seq comparing miNs between TuD-miR-NS and TuD-miR-124 treatments.

(B) Top biological GO terms associated with the 192 genes identified in (A).

(C) Predicted binding of miR-124 to the 3'UTR sequences of neuronal target genes, for example, *MAP2* and *PTBP2*, according to RNAhybrid prediction at the highlighted AGO HITS-CLIP peaks.

(D) Luciferase assays in HEK293T cells of upregulated neuronal target genes of miR-124 selected from (A). In the non-neuronal context of HEK293T cells, 3'UTRs from the neuronal genes are targeted and repressed, instead, by miR-9/9\*-124. Luminescence measured after 48 hrs of transfection and normalized to miR-NS control of each condition. Data are represented by mean  $\pm$  SEM from three independent experiments (from left, \*\*  $P = 0.0094$ ,  $P = 0.0011$ ; \*\*\*  $P < 0.001$ ; \*  $P = 0.048$ ,  $P = 0.012$ ; \*\*\*  $P < 0.001$ ).

(E) A diagram of the observed phenomenon in which miR-9/9\*-124 can promote neuronal identity by simultaneously targeting both non-neuronal genes for repression while promoting the expression of neuronal genes during neuronal conversion.

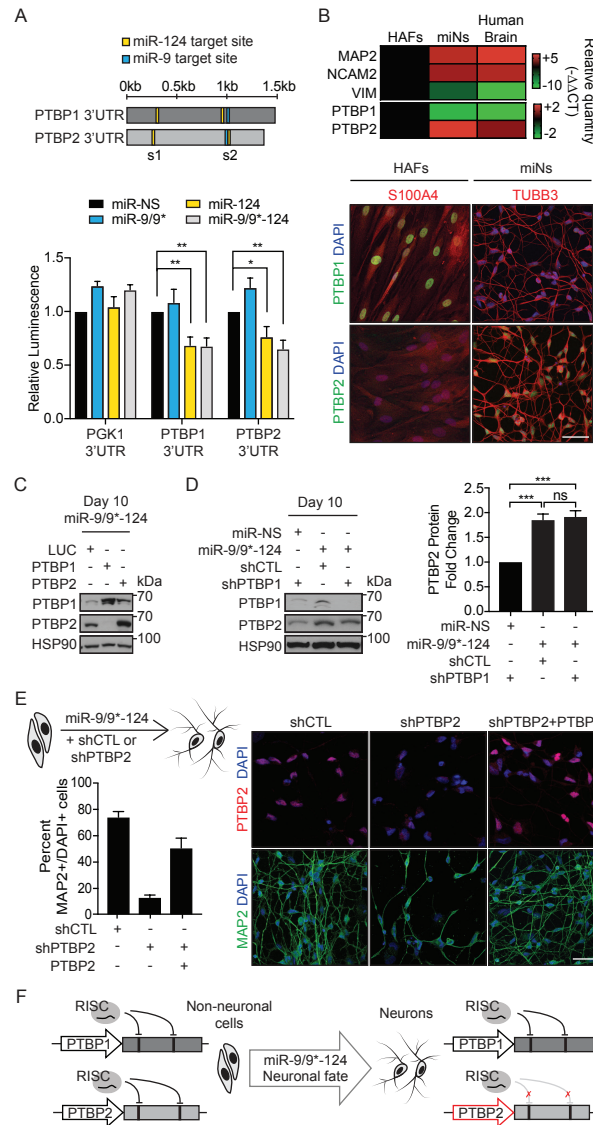

**Figure 3.** MiR-124 targets both PTBs, but differentially regulate PTB expression during neuronal conversion.

(A) Top, a schematic diagram of PTB 3'UTRs with miR-124 (yellow) and miR-9 (blue) target sites. S1 and S2 refer to the two conserved miR-124 target sites on PTBP2 3'UTR. Bottom, luciferase assays with luminescence measured after 48 hrs of transfection and normalized to miR-NS control in each condition. Data are represented by mean  $\pm$  SEM from four independent experiments. Two-way ANOVA followed by Dunnett's test (from left, PTBP1 3'UTR \*\*  $P = 0.0043$ ,  $0.0034$ ; PTBP2 3'UTR \*  $P = 0.0355$ , \*\*  $P = 0.0016$ )

(B) Top, A heatmap of gene expression assessed by qPCR in starting HAFs, day 30 miRNA-induced neurons (miNs), and human brain RNA. Bottom, PTB switching is recapitulated during the miRNA-mediated direct conversion of HAFs into neurons. HAFs and day 30 miNs immunostained for PTBP1 and PTBP2, along with a fibroblast marker, S100A4, and a pan-neuronal marker, TUBB3. Scale bar = 50  $\mu$ m.

(C) Initial induction of PTBP2 by the reduction of PTBP1 by either shRNA or miRNAs during miRNA-mediated neuronal reprogramming. PTBP1 overexpression in the miR-9/9\*-124 expression background suppresses the PTBP2 induction.

(D) Left, an immunoblot showing that PTBP1 knockdown in HAFs resulted in induction of PTBP2, but PTBP2 expression becomes more pronounced in the presence of miR-9/9\*-124 compared to PTBP1 knockdown only. Right, quantification of PTBP2 band intensity as relative fold changes compared to PTBP1 knockdown alone. Data were normalized to HSP90 from four independent experiments. The plots were represented in mean  $\pm$  SEM. One-way ANOVA followed by Tukey's test (from top \*\*\*  $P = 0.0002$ ,  $0.0004$ ; ns  $P = 0.8925$ ).

(E) Top left, a schematic diagram of the experimental procedure. Right, photographs of day 30 miNs treated with CTL shRNA, PTBP2 shRNA, or PTBP2 shRNA with PTBP2 cDNA. Cells were immunostained for PTBP2 and MAP2. Bottom left, quantification of the percentage of MAP2-positive cells with two or more neurite processes over the total number of DAPI-positive cells. Scale bar = 50  $\mu$ m. Data are represented as mean  $\pm$  SEM. One-way ANOVA followed by Tukey's test (\*\*\*  $P < 0.0001$ ; \*\*  $P = 0.0016$ ). shCTL n = MAP2 356/482; shPTBP2 n = MAP2 31/239; shPTBP2+PTBP2 n = MAP2 225/454.

(F) A model of differential miR-124 activity on PTB 3'UTRs during neuronal conversion.



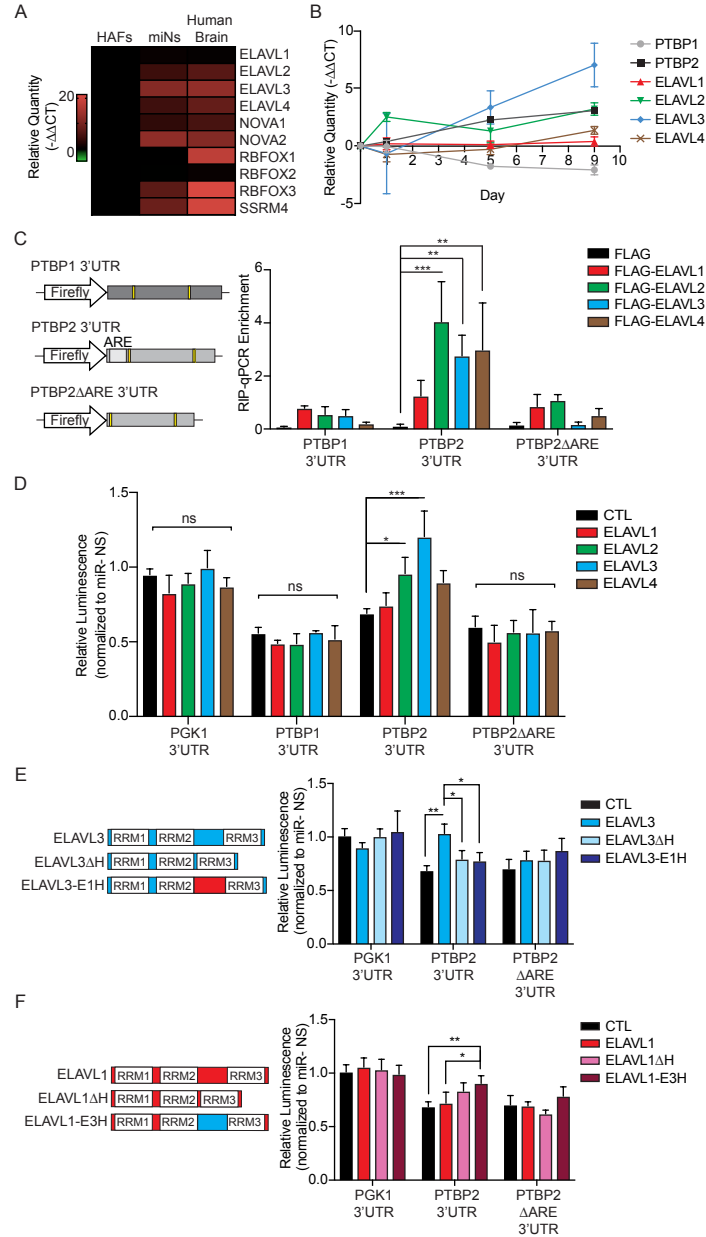

**Figure 4.** MiRNA-mediated PTBP2 upregulation requires nELAVL binding at PTBP2 3'UTR

(A) An expression heatmap of neuronal-enriched RBPs determined by qPCR in starting HAFs, day 20 miNs, and human brain RNA.

(B) Time course qPCR assays of PTB and ELAVL transcripts during neuronal reprogramming.

(C) Left, a diagram of luciferase constructs containing different PTB 3'UTRs: PTBP1 3'UTR, and PTBP2 3'UTR with and without (PTBP2ΔARE) the AU-rich element (ARE) used for RIP and luciferase assays. Right, RIP of individual FLAG-tagged ELAVLs 48 hrs after transfection. Enrichment normalized to input determined by qPCR for PTBP1 or PTBP2 3'UTR. Data are represented by mean ± SEM from three independent experiments. Two-way ANOVA followed by Dunnett's test (from left, PTBP2 3'UTR \*\*\* P = 0.0001, \*\* P = 0.0086, 0.0042).

(D) Luciferase assays with the addition of individual ELAVLs in the luciferase constructs containing the control PGK1, PTBP1, PTBP2 or PTBP2ΔARE 3'UTR. Luminescence was measured 48 hrs after the transfection and normalized miR-9/9\*-124 to miR-NS control of each condition. Data are represented by mean ± SEM from at least three independent experiments. Two-way ANOVA followed by Dunnett's test (\* P = 0.0312, \*\*\* P = 0.0001).

(E) Left, a schematic diagram of ELAVL3 hinge mutants. Right, luciferase assays with the addition of wild-type ELAVL3 or ELAVL3 hinge mutants (ELAVL3ΔH: ELAVL3 hinge deletion; ELAVL3-E1H: ELAVL3 with ELAVL1 hinge). Luminescence was measured 48 hrs after transfection and normalized miR-9/9\*-124 to miR-NS control of each condition. Data are represented by mean ± SEM from at least four independent experiments. Two-way ANOVA followed by Tukey's test (from left \*\* P = 0.0020, \* P = 0.0435, \* P = 0.0286).

(F) Left, a schematic diagram of ELAVL1 hinge mutants. Right, luciferase assays with the addition of wild-type ELAVL1 or ELAVL1 hinge mutants (ELAVL1ΔH: ELAVL1 hinge deletion; ELAVL1-E3H: ELAVL1 with ELAVL3 hinge). Luminescence was measured 48 hrs after transfection and normalized miR-9/9\*-124 to miR-NS control of each condition. Data represented in mean ± SEM from at least four independent experiments. Two-way ANOVA followed by Tukey's test (\*\* P = 0.0069, \* P = 0.0260).

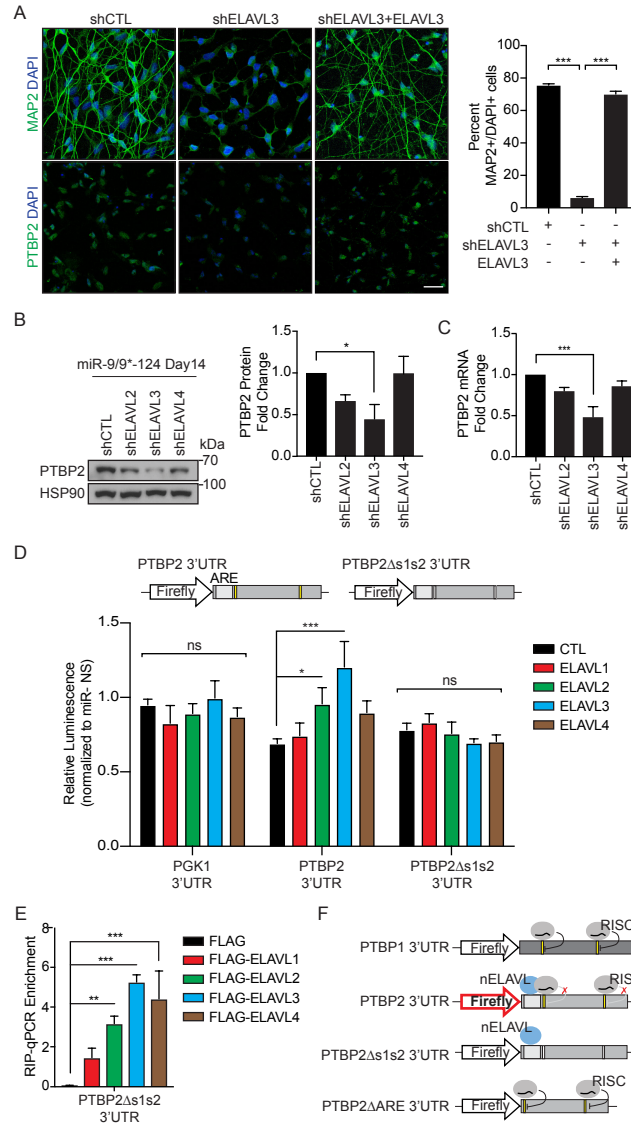

**Figure 5.** PTBP2 upregulation requires the synergism of nELAVL and miR-124

(A) Left, day 30 miNs with shRNA knockdown against CTL, ELAVL3, and ELAVL3 with ELAVL3 cDNA rescue. Cells were immunostained for MAP2 and PTBP2. Scale bar 50 = μm. Right, quantification of the percentage of MAP2-positive cells over the total number of DAPI-positive cells with two or more neurites (left). Data represented as mean ± SEM. One-way ANOVA followed by Tukey's test (from left, \*\*\* P < 0.0001, \*\*\* P < 0.0001). shCTL n = MAP2 803/1060; shELAVL3 n = MAP2 67/1052; shELAVL3 + ELAVL3 n = MAP2 431/617.

(B) Left, immunoblot analysis of PTBP2 in day14 miNs with knockdown against CTL, ELAVL2, ELAVL3, and ELAVL4. Right, quantification of the PTBP2 band intensity as a relative fold change compared to shCTL normalized to HSP90 in four independent experiments. Data are represented by mean ± SEM. One-way ANOVA followed by Dunnett's test (\* P = 0.0422).

(C) The relative quantity of PTBP2 transcript upon individual nELAVL knockdown compared to CTL at day14 miNs determined by qPCR. Data are represented by mean ± SEM from 3 independent experiments. One-way ANOVA followed by Dunnett's test (\*\*\* P = 0.0001).

(D) Top, a diagram of luciferase constructs containing PTBP2 3'UTR with or without miR-124 sites (PTBP2Δs1s2). Bottom, luciferase assays with the addition of individual ELAVLs in PGK1 control, PTBP2, or PTBP2Δs1s2 3'UTR. Luminescence was measured 48 hrs after transfection and normalized miR-9/9\*-124 to miR-NS control of each condition. Data are represented by mean ± SEM from at least three independent experiments. Two-way ANOVA followed by Dunnett's test (\* P = 0.0312, \*\*\* P = 0.0001).

(E) RIP of individual FLAG-tagged ELAVLs in PTBP2Δs1s2 3'UTR 48 hrs after transfection. Enrichment normalized to input determined through qPCR against PTBP2 3'UTR. Data are represented by mean ± SEM from three independent experiments. Two-way ANOVA followed by Dunnett's test (from left, PTBP2Δs1s2 3'UTR \*\* P = 0.0018, \*\*\* P = 0.0001, \*\*\* P = 0.0001).

(F) A schematic summary of nELAVL and RISC activities on PTB 3'UTRs.

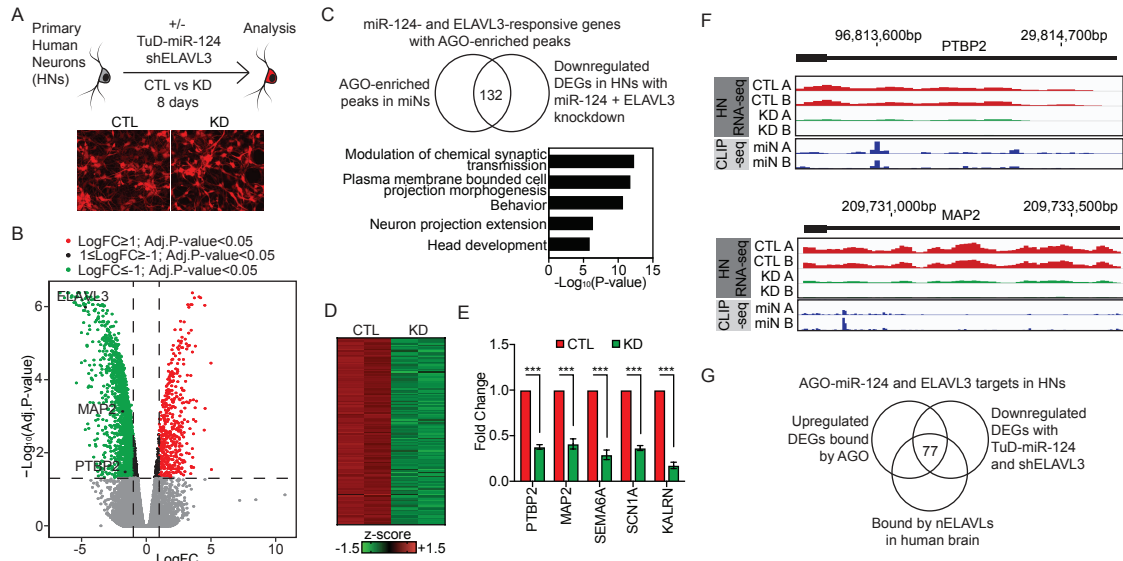

**Figure 6.** MiRNA-mediated upregulation of neuronal genes in primary human neurons  
 (A) Top, a schematic diagram of the experimental procedure using primary human neurons (HNs). Bottom, images of HNs marked by TurboRFP reporter in the non-specific miRNA or miR-124 tough decoy.  
 (B) A volcano plot of differentially expressed genes between CTL and KD conditions with TuD-miR-124 and shELAVL3 treatment. A selection of downregulated genes are highlighted (ELAVL3, MAP2, and PTBP2). Red dots, HN mRNA expression  $\text{Log}_2\text{FC} \geq 1$ ;  $\text{adj. P-value} < 0.05$ . Green dots, HN mRNA expression  $\text{Log}_2\text{FC} \leq -1$ ;  $\text{Adj. P-value} < 0.05$ .  
 (C) Top, by overlapping downregulated DEGs in (A) to previously identified upregulated AGO-enriched targets (Figure 1), 132 genes were identified to harbor AGO peaks in miNs and are downregulated with miR-124 and ELAVL3 knockdown in HNs. Bottom, top biological GO terms associated with the 102 genes.  
 (D) A heatmap of z-scores of the 132 genes identified in (B) from RNA-seq comparing KD and CTL in HNs.  
 (E) RT-qPCR validation of a selection of the identified downregulated genes in HNs (C) that are found to be commonly targeted by both miNs and HNs (B). Data are represented in  $\pm$  SEM from three independent experiments. Two-tailed unpaired t-test (all, \*\*\*  $P < 0.001$ ).  
 (F) Track views of HN RNA-seq tracks (top) and miN AGO HITS-CLIP tracks (bottom) for gene examples showing reduced expression upon knockdown of miR-124 and ELAVL3 in HNs (over CTL), and AGO-enriched peaks at the 3'UTR.  
 (G) A Venn diagram of AGO-miR-124 targets in HNs overlapped with nELAVL-bound targets in the human brain.

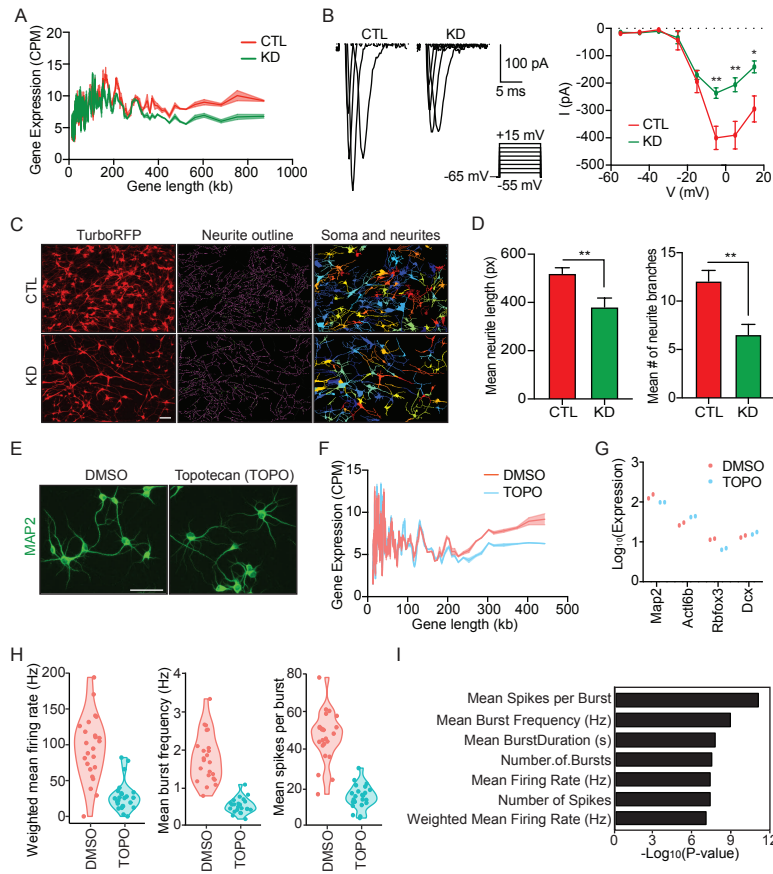

**Figure 7.** Long gene dysregulation results in altered neuronal properties

(A) LONGO plot showing reduced long gene expression upon knockdown of miR-124 and ELAVL3 (KD; green) compared to CTL (red). Lines show mean gene expression and ribbons show standard error of the mean (SEM).  
 (B) Left, voltage-clamp traces of CTL and KD (TuD-miR-124 and shELAVL3) HNs. Right, average I-V curve of for all recorded CTL and KD HNs. Data are represented in  $\pm$  SEM from seven recorded cells from each condition. Two-tailed unpaired t-test (from left, \*\* P = 0.00434 ; \* P < 0.00681 ; \* P = 0.01233).  
 (C) Representative images of CTL and KD HNs marked by TurboRFP reporter. Processed images by CellProfiler to identify neurites and associated cell soma. Scale bar = 100  $\mu$ m.  
 (D) Left, mean neurite length measurement of CTL and KD HNs. Data are represented in  $\pm$  SEM from seven separate fields of view; CTL n = 768, KD n = 677. Two-tailed unpaired t-test (\*\* P = 0.0092). Right, mean number of neurite branches in CTL and KD HNs. Data are represented in  $\pm$  SEM from seven separate fields of view; CTL n = 768, KD n = 677. Two-tailed unpaired t-test (\*\* P = 0.0038).  
 (E) Representative images of primary rat neurons stained for MAP2 after treatment with DMSO control or Topotecan (TOPO).  
 (F) LONGO plot showing reduced long gene expression upon treatment with TOPO (blue) compared to DMSO (red) in primary rat neurons. Lines show mean gene expression and ribbons show standard error of the mean (SEM).  
 (G) Expression of a select unaffected neuronal markers between DMSO and TOPO treatments.  
 (H) MEA readout for mean firing rate, burst frequency, and spikes per bursts of primary rat neurons treatment with DMSO or TOPO.  
 (I) P-value of the various measured electrophysiological properties from MEA including those shown in (H).
